# Supplementary material for: Activity regulates a cell type-specific mitochondrial phenotype in zebrafish lateral line hair cells
Source: eLife. 2023 Mar 13;12:e80468. doi: 10.7554/eLife.80468 (PMC10129330; doi:10.7554/eLife.80468)
Supplement: Figure 1—source data 1. [file elife-80468-fig1-data1.xlsx]

## Sheet: Sheet1
	Total mito volume (um3)	Number of mitos	Median Mito	Mito volume:Cell Volume	Cell volume (um3)
03052021_Left_A_HC1	12.914	28	0.191386	0.0655165	197.11
03052021_Left_A_HC2	8.74731	19	0.220229	0.0533864	163.849
03052021_Left_A_HC3	17.1821	26	0.284076	0.0795851	215.896
03052021_Left_A_HC4	19.7587	29	0.288455	0.0922945	214.083
03052021_Left_A_HC5	9.20318	35	0.154425	0.0552103	166.693
03052021_Left_A_HC6	16.2361	28	0.356618	0.0808654	200.779
03052021_Left_A_HC7	11.4771	29	0.267473	0.0643377	178.388
03052021_Left_A_HC8	12.7642	37	0.251459	0.0642357	198.709
03052021_Left_A_HC9	20.46	11	0.381633	0.0939317	217.818
03052021_Left_A_HC10	12.7087	35	0.282814	0.0707492	179.631
03052021_Left_A_HC11	7.92121	15	0.200132	0.0491119	161.289
03052021_Left_A_HC12	10.9543	39	0.205037	0.0622727	175.909
03052021_Right_A_HC1	17.4877	51	0.225984
03052021_Right_A_HC2	11.1911	21	0.343869
03052021_Right_A_HC3	10.9826	18	0.21704
03052021_Right_A_HC4	15.4463	38	0.254176
03052021_Right_A_HC5	22.897	34	0.470431
03052021_Right_A_HC6	17.8342	25	0.178606
03052021_Right_A_HC7	20.6178	26	0.18824
03052021_Right_A_HC8	12.9293	31	0.217283
03052021_Right_A_HC9	10.2496	29	0.183208
03052021_Right_A_HC10	7.33768	16	0.329798
03052021_Right_S02_C_HC1	14.6075	25	0.251869
03052021_Right_S02_C_HC2	14.6518	34	0.308396
03052021_Right_S02_C_HC3	25.3073	32	0.464314
03052021_Right_S02_C_HC4	28.9992	48	0.226111
03052021_Right_S02_C_HC7	13.1417	29	0.218536	0.0701231	187.409
03052021_Right_S02_C_HC9	23.4532	44	0.242733	0.0873142	268.607
03052021_Right_S02_C_HC12	24.6128	33	0.286724
03052021_Right_S02_C_HC13	23.4212	32	0.259994	0.0930413	251.729
03052021_Right_S02_C_HC14	23.6339	35	0.266125
03052021_Right_S02_C_HC15	10.9502	30	0.18536	0.0520875	210.227
03052021_Right_S02_C_HC16	13.7086	38	0.201317	0.0651328	210.471
03052021_Right_S02_C_HC17	22.6978	36	0.282937	0.0877472	258.673
03052021_Right_S02_C_HC18	37.8376	44	0.469561	0.116548	324.651
03052021_Right_S02_C_HC19	25.4409	45	0.276626	0.0954302	266.592
03052021_Right_S02_C_HC20	15.6803	32	0.220577	0.0707747	221.553
03052021_Right_S02_C_HC23	13.2692	50	0.19636
6dpf_Right_HC1	13.5097	43	0.166155	0.0785379	172.015
6dpf_Right_HC2	9.43882	43	0.157707	0.0628131	150.268
6dpf_Right_HC3	6.95027	29	0.163495	0.0515371	134.86
6dpf_Right_HC4	10.8792	54	0.169111	0.0736986	147.617
6dpf_Right_HC5	12.4227	59	0.147878	0.0730839	169.979
6dpf_Right_HC6	11.2808	53	0.168543	0.0731689	154.175
6dpf_Right_HC7	20.4823	55	0.150489	0.101732	201.337
6dpf_Right_HC8	6.46953	27	0.197154	0.0521618	124.028
6dpf_Right_HC9	17.7742	42	0.146863	0.0785077	226.401
6dpf_Right_HC10	20.4287	46	0.174409	0.0913989	223.512
6dpf_Right_HC11	10.647	65	0.116063	0.0589401	180.64
6dpf_Right_HC12	10.0052	35	0.233047	0.0576301	173.611
6dpf_Right_HC13	7.71218	19	0.256664	0.0484703	159.112
6dpf_Right_HC14	8.32225	22	0.232701	0.052867	157.419
6dpf_Left_HC1	24.098	49	0.237123
6dpf_Left_HC2	11.0754	46	0.184261
6dpf_Left_HC3	16.6472	38	0.20323
6dpf_Left_HC4	13.5391	54	0.146169
6dpf_Left_HC5	5.71924	21	0.271928
6dpf_Left_HC7	20.1315	58	0.232432
6dpf_Left_HC8	12.3309	54	0.158859
6dpf_Left_HC10	12.0188	46	0.156654
6dpf_Left_HC11	8.18715	29	0.158487
6dpf_Left_HC12	11.1863	75	0.0893474
6dpf_Left_HC13	6.70934	33	0.147759
6dpf_Left_HC14	5.95658	19	0.1686
6dpf_Left_HC15	5.91456	26	0.121968
03052021_Left_A_CSC1	5.08373	11	0.446369	0.0358155	141.942
03052021_Left_A_CSC2	4.95526	10	0.281444	0.0331478	149.49
03052021_Right_A_CSC1	5.95847	16	0.236858
03052021_Right_A_CSC2	5.07256	14	0.224966
03052021_Right_C-SO2_CSC1	9.95933	17	0.390618	0.0413255	240.997
03052021_Right_C-SO2_CSC2	10.6134	19	0.434241	0.0412824	257.092
03052021_Left_A_PSC1	4.52716	7	0.335864	0.0312442	144.896
03052021_Left_A_PSC2	6.72019	7	0.334394
03052021_Left_A_PSC3	4.70508	13	0.289914	0.0356198	132.092
03052021_Right_A_PSC1	5.65387	8	0.476849
03052021_Right_A_PSC2	4.39836	9	0.478937
03052021_Right_C-SO2_PSC1	6.19162	17	0.295329	0.0363348	170.405
03052021_Right_C-SO2_PSC2	9.97927	15	0.458152	0.0426075	234.214
