# Supplementary material for: Activity regulates a cell type-specific mitochondrial phenotype in zebrafish lateral line hair cells
Source: eLife. 2023 Mar 13;12:e80468. doi: 10.7554/eLife.80468 (PMC10129330; doi:10.7554/eLife.80468)
Supplement: Figure 2—figure supplement 1—source data 1. [file elife-80468-fig2-figsupp1-data1.xlsx]

## Sheet: Sheet1
	Kin Length (um)	Stereo length (um)	Total mito volume (um3)	Mito number
03052021_Left_A_HC1	13.0025	2.14485	12.914	28
03052021_Left_A_HC2	4.28219	1.58236	8.74731	19
03052021_Left_A_HC3	14.8397	2.4529	17.1821	26
03052021_Left_A_HC4	20.9713	2.81181	19.7587	29
03052021_Left_A_HC5	3.21039	0.95061	9.20318	35
03052021_Left_A_HC6	15.2738	1.67566	16.2361	28
03052021_Left_A_HC7	10.3395	2.46674	11.4771	29
03052021_Left_A_HC8	9.39515	1.39367	12.7642	37
03052021_Left_A_HC9	22.0273	2.21957	20.46	11
03052021_Left_A_HC10	12.7591	1.69296	12.7087	35
03052021_Left_A_HC11	3.49015	1.52854	7.92121	15
03052021_Left_A_HC12	6.32599	1.26089	10.9543	39
03052021_Right_A_HC1	*	2.54692	17.4877	51
03052021_Right_A_HC2	*	1.52435	11.1911	21
03052021_Right_A_HC3	*	0.71465	10.9826	18
03052021_Right_A_HC4	*	2.06359	15.4463	38
03052021_Right_A_HC5	*	2.57969	22.897	34
03052021_Right_A_HC6	*	2.22846	17.8342	25
03052021_Right_A_HC7	*	2.7043	20.6178	26
03052021_Right_A_HC8	*	1.89448	12.9293	31
03052021_Right_A_HC9	*	1.61013	10.2496	29
03052021_Right_A_HC10	*	0.74008	7.33768	16
03052021_Right_S02_C_HC1	3.92642	2.80903	14.6075	25
03052021_Right_S02_C_HC2	8.20635	2.58142	14.6518	34
03052021_Right_S02_C_HC3	3.96964	3.03744	25.3073	32
03052021_Right_S02_C_HC4	2.89083	3.50214	28.9992	48
03052021_Right_S02_C_HC7	11.4574	2.51508	13.1417	29
03052021_Right_S02_C_HC9	12.935	3.50356	23.4532	44
03052021_Right_S02_C_HC12	12.7727	4.07221	24.6128	33
03052021_Right_S02_C_HC13	12.7493	4.23131	23.4212	32
03052021_Right_S02_C_HC14	12.3515	3.74575	23.6339	35
03052021_Right_S02_C_HC15	3.38503	2.13587	10.9502	30
03052021_Right_S02_C_HC16	7.58024	1.95181	13.7086	38
03052021_Right_S02_C_HC17	11.3888	3.43561	22.6978	36
03052021_Right_S02_C_HC18	14.6772	3.03182	37.8376	44
03052021_Right_S02_C_HC19	12.968	2.2485	25.4409	45
03052021_Right_S02_C_HC20	10.9041	2.23016	15.6803	32
03052021_Right_S02_C_HC23	6.03831	1.95616	13.2692	50
6dpf_Right_HC1	*	2.99767	13.5097	43
6dpf_Right_HC2	10.0509	1.71466	9.43882	43
6dpf_Right_HC3	5.67745	1.78086	6.95027	29
6dpf_Right_HC4	14.3668	2.40936	10.8792	54
6dpf_Right_HC5	*	2.9678	12.4227	59
6dpf_Right_HC6	12.3442	1.7758	11.2808	53
6dpf_Right_HC7	*	2.97096	20.4823	55
6dpf_Right_HC8	5.06767	2.00794	6.46953	27
6dpf_Right_HC9	*	3.25203	17.7742	42
6dpf_Right_HC10	*	2.77711	20.4287	46
6dpf_Right_HC11	5.16324	1.61627	10.647	65
6dpf_Right_HC12	6.48514	1.93877	10.0052	35
6dpf_Right_HC13	1.09583	1.17912	7.71218	19
6dpf_Right_HC14	1.26969	1.36199	8.32225	22
6dpf_Left_HC1	11.5699	3.40024	24.098	49
6dpf_Left_HC2	10.8555	2.42933	11.0754	46
6dpf_Left_HC3	13.4104	3.68808	16.6472	38
6dpf_Left_HC4	14.0964	3.09532	13.5391	54
6dpf_Left_HC5	3.3697	1.29121	5.71924	21
6dpf_Left_HC7	20.6434	3.22889	20.1315	58
6dpf_Left_HC8	14.7668	1.97294	12.3309	54
6dpf_Left_HC10	13.7564	2.536	12.0188	46
6dpf_Left_HC11	5.27145	1.63873	8.18715	29
6dpf_Left_HC12	11.3425	1.81937	11.1863	75
6dpf_Left_HC13	3.55352	1.76052	6.70934	33
6dpf_Left_HC14	0.67544	0.54573	5.95658	19
6dpf_Left_HC15	1.16621	1.41408	5.91456	26
