# Supplementary material for: Activity regulates a cell type-specific mitochondrial phenotype in zebrafish lateral line hair cells
Source: eLife. 2023 Mar 13;12:e80468. doi: 10.7554/eLife.80468 (PMC10129330; doi:10.7554/eLife.80468)
Supplement: Figure 2—figure supplement 2—source data 1. [file elife-80468-fig2-figsupp2-data1.xlsx]

## Sheet: Sheet1
Volumes of individual mitochondria (um3)
SO2 HC4	SO2 HC13	SO2 HC14	SO2 HC18	0305 Left HC4	6dpf Right HC9
1.35714	12.1225	7.61674	11.8631	1.66821	4.34064
10.0408	0.672155	1.96966	0.124668	7.50417	0.063482
0.353954	0.493102	0.946805	0.124703	1.2526	1.88613
0.140821	1.34817	0.35543	2.92032	1.11134	0.094162
1.46643	0.694829	1.41936	1.60386	0.558124	0.207482
0.188781	0.398414	0.319047	0.500031	0.071943	0.938646
0.481736	0.242481	0.180259	0.17836	0.753823	0.497401
0.148212	0.13579	0.361626	0.465655	0.435863	0.241405
0.383898	0.222095	0.218057	1.15751	0.17916	0.13505
1.20471	0.298404	0.240028	0.303311	0.127088	0.448737
0.374712	0.416246	1.65891	0.824426	0.889482	1.31564
1.56768	0.378442	0.78369	1.30127	0.810356	0.375358
0.126351	0.150718	0.612232	0.241334	0.235956	0.866343
0.474681	0.213965	0.100381	0.934445	0.056271	0.486416
0.873285	0.425811	1.51047	0.097574	0.359594	1.23442
0.381682	0.883158	0.338222	2.2515	0.300081	0.53422
0.588564	0.088453	0.177147	0.473466	1.44635	0.154857
0.10763	0.070551	0.53764	0.529758	0.288455	0.219458
0.129149	0.037022	0.504333	0.097986	0.04137	0.40843
1.61707	0.353842	0.089208	0.064452	0.293437	0.087489
0.168196	0.277507	0.099131	0.804125	0.330003	0.144135
0.0491851	0.212359	0.766547	0.199687	0.158929	0.138435
0.474216	1.39826	1.12139	0.066716	0.097773	0.135393
0.266882	0.072697	0.427002	0.97145	0.142447	0.125668
1.39249	0.469545	0.052764	0.870632	0.085514	0.025572
0.236581	0.156752	0.132839	1.31093	0.133141	0.095793
0.662479	0.785471	0.141929	1.59942	0.181952	0.431565
0.236675	0.126118	0.217359	0.308323	0.229592	0.06909
0.21564	0.175524	0.204033	0.25879	0.015656	0.424255
0.110922	0.04174	0.118203	0.745898		0.233734
0.27473	0.047474	0.016898	0.383655		0.148209
0.250632	0.011592	0.012685	0.094661		0.081066
0.583108		0.05973	0.14377		0.038208
0.391878		0.266125	0.551612		0.388799
0.115539		0.058027	0.1709		0.078329
0.0881134			0.764283		0.136805
0.21098			0.118682		0.145518
0.0744182			0.067965		0.037987
0.0416944			0.636709		0.139593
0.128443			0.809574		0.111155
0.166312			0.485101		0.062627
0.1663			0.175558		0.04652
0.0635013			0.207975
0.0434854			0.033407
0.0262543
0.195351
0.187001
0.170913
