# Supplementary material for: Activity regulates a cell type-specific mitochondrial phenotype in zebrafish lateral line hair cells
Source: eLife. 2023 Mar 13;12:e80468. doi: 10.7554/eLife.80468 (PMC10129330; doi:10.7554/eLife.80468)
Supplement: Figure 2—source data 1. [file elife-80468-fig2-data1.xlsx]

## Sheet: Figure2B-G
	Stereo length (um)	Total mito volume (um3)	Number of mitos	Median mito (um3)	Max mito volume (um3)	Max mito z-score
03052021_Left_A_HC1	2.14485	12.914	28	0.191386	4.18669	4.78255
03052021_Left_A_HC2	1.58236	8.74731	19	0.220229	2.57018	3.39537
03052021_Left_A_HC3	2.4529	17.1821	26	0.284076	6.65759	4.60236
03052021_Left_A_HC4	2.81181	19.7587	29	0.288455	7.50417	4.921
03052021_Left_A_HC5	0.95061	9.20318	35	0.154425	1.74885	3.80861
03052021_Left_A_HC6	1.67566	16.2361	28	0.356618	4.49736	4.44761
03052021_Left_A_HC7	2.46674	11.4771	29	0.267473	1.92213	3.60615
03052021_Left_A_HC8	1.39367	12.7642	37	0.251459	1.46639	3.43558
03052021_Left_A_HC9	2.21957	20.46	11	0.381633	14.9802	2.99378
03052021_Left_A_HC10	1.69296	12.7087	35	0.282814	2.06825	4.38049
03052021_Left_A_HC11	1.52854	7.92121	15	0.200132	1.65324	1.90739
03052021_Left_A_HC12	1.26089	10.9543	39	0.205037	1.32748	4.00284
03052021_Right_A_HC1	2.54692	17.4877	51	0.225984	2.48612	5.52266
03052021_Right_A_HC2	1.52435	11.1911	21	0.343869	2.63549	3.66695
03052021_Right_A_HC3	0.71465	10.9826	18	0.21704	4.92017	3.55035
03052021_Right_A_HC4	2.06359	15.4463	38	0.254176	2.23835	4.2288
03052021_Right_A_HC5	2.57969	22.897	34	0.470431	3.83471	3.00377
03052021_Right_A_HC6	2.22846	17.8342	25	0.178606	8.03602	4.58592
03052021_Right_A_HC7	2.7043	20.6178	26	0.18824	12.8195	4.85779
03052021_Right_A_HC8	1.89448	12.9293	31	0.217283	2.9645	4.44855
03052021_Right_A_HC9	1.61013	10.2496	29	0.183208	1.24727	2.49443
03052021_Right_A_HC10	0.74008	7.33768	16	0.329798	1.4768	2.38788
03052021_Right_S02_C_HC1	2.80903	14.6075	25	0.251869	2.32832	2.81987
03052021_Right_S02_C_HC2	2.58142	14.6518	34	0.308396	2.45363	4.34144
03052021_Right_S02_C_HC3	3.03744	25.3073	32	0.464314	5.02396	4.25302
03052021_Right_S02_C_HC4	3.50214	28.9992	48	0.226111	10.0408	6.47521
03052021_Right_S02_C_HC7	2.51508	13.1417	29	0.218536	2.92351	3.52622
03052021_Right_S02_C_HC9	3.50356	23.4532	44	0.242733	3.45073	4.23265
03052021_Right_S02_C_HC12	4.07221	24.6128	33	0.286724	4.84824	3.63057
03052021_Right_S02_C_HC13	4.23131	23.4212	32	0.259994	12.1225	5.40527
03052021_Right_S02_C_HC14	3.74575	23.6339	35	0.266125	7.61674	5.29956
03052021_Right_S02_C_HC15	2.13587	10.9502	30	0.18536	1.99261	3.75979
03052021_Right_S02_C_HC16	1.95181	13.7086	38	0.201317	2.30656	4.02478
03052021_Right_S02_C_HC17	3.43561	22.6978	36	0.282937	5.82482	4.98223
03052021_Right_S02_C_HC18	3.03182	37.8376	44	0.469561	11.8631	6.09732
03052021_Right_S02_C_HC19	2.2485	25.4409	45	0.276626	5.04265	5.12854
03052021_Right_S02_C_HC20	2.23016	15.6803	32	0.220577	6.39746	5.28332
03052021_Right_S02_C_HC23	1.95616	13.2692	50	0.19636	0.975173	3.33591
6dpf_Right_HC1	2.99767	13.5097	43	0.166155	2.70118	5.51583
6dpf_Right_HC2	1.71466	9.43882	43	0.157707	1.07504	3.97797
6dpf_Right_HC3	1.78086	6.95027	29	0.163495	0.732384	2.55339
6dpf_Right_HC4	2.40936	10.8792	54	0.169111	0.774508	3.97869
6dpf_Right_HC5	2.9678	12.4227	59	0.147878	1.79686	6.23281
6dpf_Right_HC6	1.7758	11.2808	53	0.168543	1.02077	4.23244
6dpf_Right_HC7	2.97096	20.4823	55	0.150489	2.34757	3.71327
6dpf_Right_HC8	2.00794	6.46953	27	0.197154	0.830998	2.78726
6dpf_Right_HC9	3.25203	17.7742	42	0.146863	4.34064	5.34428
6dpf_Right_HC10	2.77711	20.4287	46	0.174409	7.29039	6.31382
6dpf_Right_HC11	1.61627	10.647	65	0.116063	0.724368	3.72594
6dpf_Right_HC12	1.93877	10.0052	35	0.233047	0.967723	2.97174
6dpf_Right_HC13	1.17912	7.71218	19	0.256664	2.67056	3.74055
6dpf_Right_HC14	1.36199	8.32225	22	0.232701	2.03437	3.37259
6dpf_Left_HC1	3.40024	24.098	49	0.237123	3.1637	4.44778
6dpf_Left_HC2	2.42933	11.0754	46	0.184261	0.703191	2.47769
6dpf_Left_HC3	3.68808	16.6472	38	0.20323	3.95216	4.72608
6dpf_Left_HC4	3.09532	13.5391	54	0.146169	1.32307	4.02965
6dpf_Left_HC5	1.29121	5.71924	21	0.271928	0.654561	2.51713
6dpf_Left_HC7	3.22889	20.1315	58	0.232432	1.59191	3.68105
6dpf_Left_HC8	1.97294	12.3309	54	0.158859	1.34972	4.64236
6dpf_Left_HC10	2.536	12.0188	46	0.156654	1.78803	5.15932
6dpf_Left_HC11	1.63873	8.18715	29	0.158487	1.57863	4.27532
6dpf_Left_HC12	1.81937	11.1863	75	0.0893474	0.756636	4.10414
6dpf_Left_HC13	1.76052	6.70934	33	0.147759	0.802483	3.1327
6dpf_Left_HC14	0.54573	5.95658	19	0.1686	2.0259	3.77855
6dpf_Left_HC15	1.41408	5.91456	26	0.121968	1.01677	2.97814
03052021_Left_A_CSC1						2.0939
03052021_Left_A_CSC2						2.07232
03052021_Right_A_CSC1						2.27759
03052021_Right_A_CSC2						2.3146
03052021_Right_C-SO2_CSC1						2.91799
03052021_Right_C-SO2_CSC2						2.51707
03052021_Left_A_PSC1						1.512
03052021_Left_A_PSC2						2.1117
03052021_Left_A_PSC3						2.31971
03052021_Right_A_PSC1						1.70674
03052021_Right_A_PSC2						1.46269
03052021_Right_C-SO2_PSC1						3.23204
03052021_Right_C-SO2_PSC2						2.28003

## Sheet: Figure2H-I
		Percent max mito
In order of stereo length (smallest to largest)	Ster length (um)	0-25	25-50	50-75	75-100
6dpf_Left_HC14	0.54573	76.4045	23.5955	0	0
0305R HC3	0.71465	10.3215	25.3807	42.3012	21.9966
0305R HC10	0.74008	0	77.7778	22.2222	0
0305L HC5	0.95061	76.2542	23.7458	0	0
6dpf_Right_HC13	1.17912	54.8807	45.1193	0	0
0305L HC12	1.26089	15.9794	73.1959	10.8247	0
6dpf_Left_HC5	1.29121	0	76.4706	23.5294	0
6dpf_Right_HC14	1.36199	36.7725	44.1799	17.9894	1.0582
0305L HC8	1.39367	0	20.5	29	50.5
6dpf_Left_HC15	1.41408	0	0	15.3061	84.6939
0305R HC2	1.52435	8.72727	13.0909	45.4545	32.7273
0305L HC11	1.52854	0	0	17.6166	82.3834
0305L HC2	1.58236	4.09836	16.9399	28.9617	50
0305L HC9	1.61013	0	20.5	29	50.5
6dpf_Right_HC11	1.61627	0	0	12.5	87.5
6dpf_Left_HC11	1.63873	0	0	29.6774	70.3226
0305L HC6	1.67566	0	14.2857	28.5714	57.1429
0305L HC10	1.69296	2.36941	23.6941	27.2482	46.6882
6dpf_Right_HC2	1.71466	0	0	19.6429	80.3571
6dpf_Left_HC13	1.76052	52.7778	47.2222	0	0
6dpf_Right_HC6	1.7758	0	0	2.5641	97.4359
6dpf_Right_HC3	1.78086	34.9593	65.0407	0	0
6dpf_Left_HC12	1.81937	0	0	58.4906	41.5094
0305R HC8	1.89448	0	28.0899	50.9363	20.9738
6dpf_Right_HC12	1.93877	35.7143	51.1905	13.0952	0
0305RSO2HC16	1.95181	0	0	0	100
0305RSO2HC23	1.95616	0	0	0	100
6dpf_Left_HC8	1.97294	0	0	0	100
6dpf_Right_HC8	2.00794	42.268	47.4227	10.3093	0
0305R HC4	2.06359	0	0	39.0625	60.9375
0305RSO2HC15	2.13587	0	81.9209	18.0791	0
0305L HC1	2.14485	28.6207	16.2069	16.5517	38.6207
0305R HC9	2.21957	0	0	0	100
0305R HC6	2.22846	0.872093	17.8295	21.6085	59.6899
0305RSO2HC20	2.23016	0	16.2736	31.6038	52.1226
0305RSO2HC19	2.2485	0	0	0	100
6dpf_Right_HC4	2.40936	0	0	9.09091	90.9091
6dpf_Left_HC2	2.42933	0	0	100	0
0305L HC3	2.4529	0.931677	15.1139	23.2919	60.6625
0305L HC7	2.46674	0	36.3095	42.2619	21.4286
0305RSO2HC7	2.51508	0	8.99471	32.2751	58.7302
6dpf_Left_HC10	2.536	0	0	13.3333	86.6667
0305R HC1	2.54692	0	0	27.5132	72.4868
0305R HC5	2.57969	67.602	11.7347	20.6633	0
0305RSO2HC2	2.58142	0	0	23.0415	76.9585
0305R HC7	2.7043	0.757135	20.6174	46.5347	32.0909
6dpf_Right_HC10	2.77711	0	1.72414	19.3487	78.9272
0305RSO2HC1	2.80903	0	29.1457	38.191	32.6633
0305L HC4	2.81181	0.644122	14.8148	35.3462	49.1948
6dpf_Right_HC5	2.9678	0	4.34783	46.5217	49.1304
6dpf_Right_HC7	2.97096	0	0	0	100
6dpf_Right_HC1	2.99767	0	0	2.64317	97.3568
0305RSO2HC18	3.03182	0	2.90621	22.5892	74.5046
0305RSO2HC3	3.03744	21.5339	30.0885	40.118	8.25959
6dpf_Left_HC4	3.09532	0	0	11.1111	88.8889
6dpf_Left_HC7	3.22889	0	0	1.39535	98.6047
6dpf_Right_HC9	3.25203	6.06061	24.3939	17.4242	52.1212
6dpf_Left_HC1	3.40024	0	0	8.92857	91.0714
0305RSO2HC17	3.43561	0	0	25.5869	74.4131
0305RSO2HC4	3.50214	0	0	9.43953	90.5605
0305RSO2HC9	3.50356	0	6.12245	15.5102	78.3673
6dpf_Left_HC3	3.68808	0	7.75862	36.3793	55.8621
0305RSO2HC14	3.74575	0	9.74212	15.7593	74.4986
0305RSO2HC12	4.07221	0	7.56098	7.56098	84.878
0305RSO2HC13	4.23131	0.455581	9.4533	22.2096	67.8815

## Sheet: Figure 2J
	75-100%
6dpf_Left_HC14	0
0305R HC3	21.9966
0305R HC10	0
0305L HC5	0
6dpf_Right_HC13	0
0305L HC12	0
6dpf_Left_HC5	0
6dpf_Right_HC14	1.0582
0305L HC8	50.5
6dpf_Left_HC15	84.6939
0305R HC2	32.7273
0305L HC11	82.3834
0305L HC2	50
0305L HC9	50.5
6dpf_Right_HC11	87.5
6dpf_Left_HC11	70.3226
0305L HC6	57.1429
0305L HC10	46.6882
6dpf_Right_HC2	80.3571
6dpf_Left_HC13	0
6dpf_Right_HC6	97.4359
6dpf_Right_HC3	0
6dpf_Left_HC12	41.5094
0305R HC8	20.9738
6dpf_Right_HC12	0
0305RSO2HC16	100
0305RSO2HC23	100
6dpf_Left_HC8	100
6dpf_Right_HC8	0
0305R HC4	60.9375
0305RSO2HC15	0
0305L HC1	38.6207
0305R HC9	100
0305R HC6	59.6899
0305RSO2HC20	52.1226
0305RSO2HC19	100
6dpf_Right_HC4	90.9091
6dpf_Left_HC2	0
0305L HC3	60.6625
0305L HC7	21.4286
0305RSO2HC7	58.7302
6dpf_Left_HC10	86.6667
0305R HC1	72.4868
0305R HC5	0
0305RSO2HC2	76.9585
0305R HC7	32.0909
6dpf_Right_HC10	78.9272
0305RSO2HC1	32.6633
0305L HC4	49.1949
6dpf_Right_HC5	49.1304
6dpf_Right_HC7	100
6dpf_Right_HC1	97.3568
0305RSO2HC18	74.5046
0305RSO2HC3	8.25959
6dpf_Left_HC4	88.8889
6dpf_Left_HC7	98.6047
6dpf_Right_HC9	52.1212
6dpf_Left_HC1	91.0714
0305RSO2HC17	74.4132
0305RSO2HC4	90.5605
0305RSO2HC9	78.3674
6dpf_Left_HC3	55.8621
0305RSO2HC14	74.4986
0305RSO2HC12	84.8781
0305RSO2HC13	67.8816
