# Supplementary material for: Activity regulates a cell type-specific mitochondrial phenotype in zebrafish lateral line hair cells
Source: eLife. 2023 Mar 13;12:e80468. doi: 10.7554/eLife.80468 (PMC10129330; doi:10.7554/eLife.80468)
Supplement: Figure 3—figure supplement 1—source data 1. [file elife-80468-fig3-figsupp1-data1.xlsx]

## Sheet: Figure 3
	Total Ribbon Volume (um3)	Average Ribbon Volume (um3)	Number of Ribbons
03052021_Left_A_HC1	0.63187	0.126374	5
03052021_Left_A_HC2	0.363777	0.0727554	5
03052021_Left_A_HC3	0.751621	0.12527	6
03052021_Left_A_HC4	0.799301	0.133217	6
03052021_Left_A_HC5	0.42281	0.0528512	8
03052021_Left_A_HC6	0.74307	0.123845	6
03052021_Left_A_HC7	0.501068	0.100214	5
03052021_Left_A_HC8	0.617191	0.0881701	7
03052021_Left_A_HC9	0.636639	0.127328	5
03052021_Left_A_HC10	0.677384	0.0846729	8
03052021_Left_A_HC11	0.245466	0.0490932	5
03052021_Left_A_HC12	0.506727	0.056303	9
03052021_Right_A_HC1	0.824361	0.137393	6
03052021_Right_A_HC2	0.565761	0.0942935	6
03052021_Right_A_HC3	0.493979	0.0987957	5
03052021_Right_A_HC4	0.850892	0.121556	7
03052021_Right_A_HC5	0.855676	0.142613	6
03052021_Right_A_HC6	0.868691	0.144782	6
03052021_Right_A_HC7	0.969533	0.161589	6
03052021_Right_A_HC8	0.617326	0.0881895	7
03052021_Right_A_HC9	0.538052	0.0768646	7
03052021_Right_A_HC10	0.173097	0.0346193	5
03052021_Right_S02_C_HC1	0.446451	0.111613	4
03052021_Right_S02_C_HC2	0.494348	0.164783	3
03052021_Right_S02_C_HC3	0.804093	0.160819	5
03052021_Right_S02_C_HC4	1.01615	0.203229	5
03052021_Right_S02_C_HC7	0.522909	0.130727	4
03052021_Right_S02_C_HC9	0.794527	0.264842	3
03052021_Right_S02_C_HC12	0.814517	0.162903	5
03052021_Right_S02_C_HC13	0.854916	0.170983	5
03052021_Right_S02_C_HC14	0.76315	0.254383	3
03052021_Right_S02_C_HC15	0.413737	0.0689562	6
03052021_Right_S02_C_HC16	0.710093	0.142019	5
03052021_Right_S02_C_HC17	0.893534	0.178707	5
03052021_Right_S02_C_HC18	0.910884	0.182177	5
03052021_Right_S02_C_HC19	0.791391	0.197848	4
03052021_Right_S02_C_HC20	0.650036	0.130007	5
03052021_Right_S02_C_HC23	0.584726	0.0974543	6
6dpf_Right_HC1	0.666651	0.111108	6
6dpf_Right_HC2	0.605569	0.100928	6
6dpf_Right_HC3	0.294445	0.0736112	4
6dpf_Right_HC4	0.432401	0.0864803	5
6dpf_Right_HC5	0.604863	0.100811	6
6dpf_Right_HC6	0.716253	0.0895316	8
6dpf_Right_HC7	0.838612	0.119802	7
6dpf_Right_HC8	0.237413	0.0593533	4
6dpf_Right_HC9	0.823588	0.137265	6
6dpf_Right_HC10	0.829703	0.118529	7
6dpf_Right_HC11	0.478852	0.119713	4
6dpf_Right_HC12	0.362991	0.0907476	4
6dpf_Right_HC13	0.19392	0.0646399	3
6dpf_Right_HC14	0.167654	0.0279424	6
6dpf_Left_HC1	1.09568	0.182613	6
6dpf_Left_HC2	0.680109	0.136022	5
6dpf_Left_HC3	0.761458	0.152292	5
6dpf_Left_HC4	0.517685	0.103537	5
6dpf_Left_HC5	0.320523	0.0641046	5
6dpf_Left_HC7	0.612095	0.102016	6
6dpf_Left_HC8	0.688262	0.0983231	7
6dpf_Left_HC10	0.480003	0.0800005	6
6dpf_Left_HC11	0.347393	0.0434241	8
6dpf_Left_HC12	0.619873	0.0885533	7
6dpf_Left_HC13	0.260353	0.0520706	5
6dpf_Left_HC14	0.124894	0.0208157	6
6dpf_Left_HC15	0.121372	0.0404574	3
