# Supplementary material for: Activity regulates a cell type-specific mitochondrial phenotype in zebrafish lateral line hair cells
Source: eLife. 2023 Mar 13;12:e80468. doi: 10.7554/eLife.80468 (PMC10129330; doi:10.7554/eLife.80468)
Supplement: Figure 3—source data 1. [file elife-80468-fig3-data1.xlsx]

## Sheet: Figure 3
	Stereo length (um)	Total Ribbon Volume (um3)	Average Ribbon Volume (um3)	Number of Ribbons	Total Mito Volume (um3)	Max mito distance to ribbons (um)	Med mito distance to ribbons (um)
03052021_Left_A_HC1	2.14485	0.63187	0.126374	5	12.914	0.9455	9.05605
03052021_Left_A_HC2	1.58236	0.363777	0.0727554	5	8.74731	0.80582	6.01238
03052021_Left_A_HC3	2.4529	0.751621	0.12527	6	17.1821	0.51743	2.59618
03052021_Left_A_HC4	2.81181	0.799301	0.133217	6	19.7587	0.698605	5.50777
03052021_Left_A_HC5	0.95061	0.42281	0.0528512	8	9.20318	5.81499	8.44002
03052021_Left_A_HC6	1.67566	0.74307	0.123845	6	16.2361	0.542439	7.7094
03052021_Left_A_HC7	2.46674	0.501068	0.100214	5	11.4771	2.17509	2.4833
03052021_Left_A_HC8	1.39367	0.617191	0.0881701	7	12.7642	1.17763	6.2919
03052021_Left_A_HC9	2.21957	0.636639	0.127328	5	20.46	0.534383	8.00872
03052021_Left_A_HC10	1.69296	0.677384	0.0846729	8	12.7087	0.882029	9.01606
03052021_Left_A_HC11	1.52854	0.245466	0.0490932	5	7.92121	3.66393	5.31459
03052021_Left_A_HC12	1.26089	0.506727	0.056303	9	10.9543	1.13193	5.72481
03052021_Right_A_HC1	2.54692	0.824361	0.137393	6	17.4877	0.979918	7.40074
03052021_Right_A_HC2	1.52435	0.565761	0.0942935	6	11.1911	0.831776	5.54525
03052021_Right_A_HC3	0.71465	0.493979	0.0987957	5	10.9826	0.551591	6.66475
03052021_Right_A_HC4	2.06359	0.850892	0.121556	7	15.4463	1.72598	8.36295
03052021_Right_A_HC5	2.57969	0.855676	0.142613	6	22.897	1.28393	4.13106
03052021_Right_A_HC6	2.22846	0.868691	0.144782	6	17.8342	0.639826	5.44433
03052021_Right_A_HC7	2.7043	0.969533	0.161589	6	20.6178	0.803756	6.22221
03052021_Right_A_HC8	1.89448	0.617326	0.0881895	7	12.9293	1.31343	7.05503
03052021_Right_A_HC9	1.61013	0.538052	0.0768646	7	10.2496	1.03649	7.07639
03052021_Right_A_HC10	0.74008	0.173097	0.0346193	5	7.33768	3.99847	3.11774
03052021_Right_S02_C_HC1	2.80903	0.446451	0.111613	4	14.6075	2.80581	0.742599
03052021_Right_S02_C_HC2	2.58142	0.494348	0.164783	3	14.6518	0.914286	4.01248
03052021_Right_S02_C_HC3	3.03744	0.804093	0.160819	5	25.3073	1.79158	4.34859
03052021_Right_S02_C_HC4	3.50214	1.01615	0.203229	5	28.9992	0.629056	8.697
03052021_Right_S02_C_HC7	2.51508	0.522909	0.130727	4	13.1417	1.18481	9.84064
03052021_Right_S02_C_HC9	3.50356	0.794527	0.264842	3	23.4532	0.677336	5.22668
03052021_Right_S02_C_HC12	4.07221	0.814517	0.162903	5	24.6128	0.67225	4.00803
03052021_Right_S02_C_HC13	4.23131	0.854916	0.170983	5	23.4212	0.601087	6.25497
03052021_Right_S02_C_HC14	3.74575	0.76315	0.254383	3	23.6339	0.605962	3.04858
03052021_Right_S02_C_HC15	2.13587	0.413737	0.0689562	6	10.9502	4.76682	5.79405
03052021_Right_S02_C_HC16	1.95181	0.710093	0.142019	5	13.7086	0.537147	8.11503
03052021_Right_S02_C_HC17	3.43561	0.893534	0.178707	5	22.6978	0.605905	7.43803
03052021_Right_S02_C_HC18	3.03182	0.910884	0.182177	5	37.8376	0.544821	11.5906
03052021_Right_S02_C_HC19	2.2485	0.791391	0.197848	4	25.4409	0.575996	6.17557
03052021_Right_S02_C_HC20	2.23016	0.650036	0.130007	5	15.6803	0.724639	6.69363
03052021_Right_S02_C_HC23	1.95616	0.584726	0.0974543	6	13.2692	1.508	11.5036
6dpf_Right_HC1	2.99767	0.666651	0.111108	6	13.5097	0.662822	4.13783
6dpf_Right_HC2	1.71466	0.605569	0.100928	6	9.43882	1.0268	7.64318
6dpf_Right_HC3	1.78086	0.294445	0.0736112	4	6.95027	7.90726	6.00525
6dpf_Right_HC4	2.40936	0.432401	0.0864803	5	10.8792	1.78697	2.06559
6dpf_Right_HC5	2.9678	0.604863	0.100811	6	12.4227	0.988678	8.00658
6dpf_Right_HC6	1.7758	0.716253	0.0895316	8	11.2808	1.27916	7.7324
6dpf_Right_HC7	2.97096	0.838612	0.119802	7	20.4823	0.702909	3.84466
6dpf_Right_HC8	2.00794	0.237413	0.0593533	4	6.46953	5.10289	1.78029
6dpf_Right_HC9	3.25203	0.823588	0.137265	6	17.7742	1.11476	10.8835
6dpf_Right_HC10	2.77711	0.829703	0.118529	7	20.4287	0.705231	9.18762
6dpf_Right_HC11	1.61627	0.478852	0.119713	4	10.647	1.76885	5.09444
6dpf_Right_HC12	1.93877	0.362991	0.0907476	4	10.0052	4.48163	1.50726
6dpf_Right_HC13	1.17912	0.19392	0.0646399	3	7.71218	9.65196	5.44851
6dpf_Right_HC14	1.36199	0.167654	0.0279424	6	8.32225	2.43007	6.6198
6dpf_Left_HC1	3.40024	1.09568	0.182613	6	24.098	0.825677	9.43208
6dpf_Left_HC2	2.42933	0.680109	0.136022	5	11.0754	1.63403	7.70905
6dpf_Left_HC3	3.68808	0.761458	0.152292	5	16.6472	1.07038	7.52744
6dpf_Left_HC4	3.09532	0.517685	0.103537	5	13.5391	0.938506	8.16145
6dpf_Left_HC5	1.29121	0.320523	0.0641046	5	5.71924	4.75281	1.72753
6dpf_Left_HC7	3.22889	0.612095	0.102016	6	20.1315	0.81947	7.12818
6dpf_Left_HC8	1.97294	0.688262	0.0983231	7	12.3309	1.67462	7.95976
6dpf_Left_HC10	2.536	0.480003	0.0800005	6	12.0188	0.714632	6.68858
6dpf_Left_HC11	1.63873	0.347393	0.0434241	8	8.18715	0.669371	5.84006
6dpf_Left_HC12	1.81937	0.619873	0.0885533	7	11.1863	2.7552	8.19169
6dpf_Left_HC13	1.76052	0.260353	0.0520706	5	6.70934	8.75042	1.3265
6dpf_Left_HC14	0.54573	0.124894	0.0208157	6	5.95658	9.3388	8.71298
6dpf_Left_HC15	1.41408	0.121372	0.0404574	3	5.91456	0.730385	10.0046
