# Supplementary material for: Activity regulates a cell type-specific mitochondrial phenotype in zebrafish lateral line hair cells
Source: eLife. 2023 Mar 13;12:e80468. doi: 10.7554/eLife.80468 (PMC10129330; doi:10.7554/eLife.80468)
Supplement: Figure 4—figure supplement 1—source data 1. [file elife-80468-fig4-figsupp1-data1.xlsx]

## Sheet: Sheet1
	kin length (um)	stereo length (um)
02010_3dpf_C_left_HC1	4.47699	1.53252
02010_3dpf_C_left_HC2	9.13587	1.886
02010_3dpf_C_left_HC5	3.92725	1.36884
02010_3dpf_C_left_HC6	10.03	2.58462
02010_3dpf_C_left_HC3	0.1647	0.60483
02010_3dpf_C_left_HC4	0.37108	0.45401
021020_3dpfA_Right_HC1	4.88655	0.78
021020_3dpfA_Right_HC2	6.20078	0.85547
021020_3dpfA_Right_HC3	5.01531	0.52711
021020_3dpfA_Right_HC4	3.73409	1.8932
021020_3dpfA_Right_HC5	0.31879	0.79564
021020_3dpfA_Right_HC6	1.01549	0.14431
03052021_Left_A_HC1		2.14485
03052021_Left_A_HC2		1.58236
03052021_Left_A_HC3		2.4529
03052021_Left_A_HC4		2.81181
03052021_Left_A_HC5		0.95061
03052021_Left_A_HC6		1.67566
03052021_Left_A_HC7		2.46674
03052021_Left_A_HC8		1.39367
03052021_Left_A_HC9		2.21957
03052021_Left_A_HC10		1.69296
03052021_Left_A_HC11		1.52854
03052021_Left_A_HC12		1.26089
03052021_Right_A_HC1		2.54692
03052021_Right_A_HC2		1.52435
03052021_Right_A_HC3		0.71465
03052021_Right_A_HC4		2.06359
03052021_Right_A_HC5		2.57969
03052021_Right_A_HC6		2.22846
03052021_Right_A_HC7		2.7043
03052021_Right_A_HC8		1.89448
03052021_Right_A_HC9		1.61013
03052021_Right_A_HC10		0.74008
03052021_Right_S02_C_HC1		2.80903
03052021_Right_S02_C_HC2		2.58142
03052021_Right_S02_C_HC3		3.03744
03052021_Right_S02_C_HC4		3.50214
03052021_Right_S02_C_HC7		2.51508
03052021_Right_S02_C_HC9		3.50356
03052021_Right_S02_C_HC12		4.07221
03052021_Right_S02_C_HC13		4.23131
03052021_Right_S02_C_HC14		3.74575
03052021_Right_S02_C_HC15		2.13587
03052021_Right_S02_C_HC16		1.95181
03052021_Right_S02_C_HC17		3.43561
03052021_Right_S02_C_HC18		3.03182
03052021_Right_S02_C_HC19		2.2485
03052021_Right_S02_C_HC20		2.23016
03052021_Right_S02_C_HC23		1.95616
6dpf_Right_HC1		2.99767
6dpf_Right_HC2		1.71466
6dpf_Right_HC3		1.78086
6dpf_Right_HC4		2.40936
6dpf_Right_HC5		2.9678
6dpf_Right_HC6		1.7758
6dpf_Right_HC7		2.97096
6dpf_Right_HC8		2.00794
6dpf_Right_HC9		3.25203
6dpf_Right_HC10		2.77711
6dpf_Right_HC11		1.61627
6dpf_Right_HC12		1.93877
6dpf_Right_HC13		1.17912
6dpf_Right_HC14		1.36199
6dpf_Left_HC1		3.40024
6dpf_Left_HC2		2.42933
6dpf_Left_HC3		3.68808
6dpf_Left_HC4		3.09532
6dpf_Left_HC5		1.29121
6dpf_Left_HC7		3.22889
6dpf_Left_HC8		1.97294
6dpf_Left_HC10		2.536
6dpf_Left_HC11		1.63873
6dpf_Left_HC12		1.81937
6dpf_Left_HC13		1.76052
6dpf_Left_HC14		0.54573
6dpf_Left_HC15		1.41408
