# Supplementary material for: Activity regulates a cell type-specific mitochondrial phenotype in zebrafish lateral line hair cells
Source: eLife. 2023 Mar 13;12:e80468. doi: 10.7554/eLife.80468 (PMC10129330; doi:10.7554/eLife.80468)
Supplement: Figure 4—figure supplement 2—source data 1. [file elife-80468-fig4-figsupp2-data1.xlsx]

## Sheet: Sheet1
	Stereo length (um)	Total mito volume (um3)	Total Ribbon Volume (um3)	Average Ribbon Volume (um3)	Number of Ribbons	Max Mito distance to ribbons (um)	Median mito distance to ribbons (um)
02010_3dpf_C_left_HC1	1.53252	12.2002	0.289614	0.0482689	6	4.41878	5.38803
02010_3dpf_C_left_HC2	1.886	18.1514	0.354281	0.0885704	4	2.8694	2.35185
02010_3dpf_C_left_HC5	1.36884	12.4562	0.221559	0.0316513	7	5.2959	5.9568
02010_3dpf_C_left_HC6	2.58462	18.1466	0.396356	0.0566222	7	0.76814	6.06908
02010_3dpf_C_left_HC3	0.60483	6.50766	*	*	*	*	*
02010_3dpf_C_left_HC4	0.45401	7.41685	*	*	*	*	*
021020_3dpfA_Right_HC1	0.78	12.2002	0.429508	0.0715847	6	1.08639	9.26919
021020_3dpfA_Right_HC2	0.85547	18.1514	0.480764	0.0686806	7	1.00045	5.12488
021020_3dpfA_Right_HC3	0.52711	12.4562	0.358738	0.0597896	6	0.634422	7.10401
021020_3dpfA_Right_HC4	1.8932	18.1466	0.613646	0.102274	6	0.826974	2.68501
021020_3dpfA_Right_HC5	0.79564	13.3027	0.190462	0.0272088	7	5.77374	6.68549
021020_3dpfA_Right_HC6	0.14431	12.6784	0.200701	0.0501752	4	3.08975	9.72609
03052021_Left_A_HC1			0.63187	0.126374	5
03052021_Left_A_HC2			0.363777	0.0727554	5
03052021_Left_A_HC3			0.751621	0.12527	6
03052021_Left_A_HC4			0.799301	0.133217	6
03052021_Left_A_HC5			0.42281	0.0528512	8
03052021_Left_A_HC6			0.74307	0.123845	6
03052021_Left_A_HC7			0.501068	0.100214	5
03052021_Left_A_HC8			0.617191	0.0881701	7
03052021_Left_A_HC9			0.636639	0.127328	5
03052021_Left_A_HC10			0.677384	0.0846729	8
03052021_Left_A_HC11			0.245466	0.0490932	5
03052021_Left_A_HC12			0.506727	0.056303	9
03052021_Right_A_HC1			0.824361	0.137393	6
03052021_Right_A_HC2			0.565761	0.0942935	6
03052021_Right_A_HC3			0.493979	0.0987957	5
03052021_Right_A_HC4			0.850892	0.121556	7
03052021_Right_A_HC5			0.855676	0.142613	6
03052021_Right_A_HC6			0.868691	0.144782	6
03052021_Right_A_HC7			0.969533	0.161589	6
03052021_Right_A_HC8			0.617326	0.0881895	7
03052021_Right_A_HC9			0.538052	0.0768646	7
03052021_Right_A_HC10			0.173097	0.0346193	5
03052021_Right_S02_C_HC1			0.446451	0.111613	4
03052021_Right_S02_C_HC2			0.494348	0.164783	3
03052021_Right_S02_C_HC3			0.804093	0.160819	5
03052021_Right_S02_C_HC4			1.01615	0.203229	5
03052021_Right_S02_C_HC7			0.522909	0.130727	4
03052021_Right_S02_C_HC9			0.794527	0.264842	3
03052021_Right_S02_C_HC12			0.814517	0.162903	5
03052021_Right_S02_C_HC13			0.854916	0.170983	5
03052021_Right_S02_C_HC14			0.76315	0.254383	3
03052021_Right_S02_C_HC15			0.413737	0.0689562	6
03052021_Right_S02_C_HC16			0.710093	0.142019	5
03052021_Right_S02_C_HC17			0.893534	0.178707	5
03052021_Right_S02_C_HC18			0.910884	0.182177	5
03052021_Right_S02_C_HC19			0.791391	0.197848	4
03052021_Right_S02_C_HC20			0.650036	0.130007	5
03052021_Right_S02_C_HC23			0.584726	0.0974543	6
6dpf_Right_HC1			0.666651	0.111108	6
6dpf_Right_HC2			0.605569	0.100928	6
6dpf_Right_HC3			0.294445	0.0736112	4
6dpf_Right_HC4			0.432401	0.0864803	5
6dpf_Right_HC5			0.604863	0.100811	6
6dpf_Right_HC6			0.716253	0.0895316	8
6dpf_Right_HC7			0.838612	0.119802	7
6dpf_Right_HC8			0.237413	0.0593533	4
6dpf_Right_HC9			0.823588	0.137265	6
6dpf_Right_HC10			0.829703	0.118529	7
6dpf_Right_HC11			0.478852	0.119713	4
6dpf_Right_HC12			0.362991	0.0907476	4
6dpf_Right_HC13			0.19392	0.0646399	3
6dpf_Right_HC14			0.167654	0.0279424	6
6dpf_Left_HC1			1.09568	0.182613	6
6dpf_Left_HC2			0.680109	0.136022	5
6dpf_Left_HC3			0.761458	0.152292	5
6dpf_Left_HC4			0.517685	0.103537	5
6dpf_Left_HC5			0.320523	0.0641046	5
6dpf_Left_HC7			0.612095	0.102016	6
6dpf_Left_HC8			0.688262	0.0983231	7
6dpf_Left_HC10			0.480003	0.0800005	6
6dpf_Left_HC11			0.347393	0.0434241	8
6dpf_Left_HC12			0.619873	0.0885533	7
6dpf_Left_HC13			0.260353	0.0520706	5
6dpf_Left_HC14			0.124894	0.0208157	6
6dpf_Left_HC15			0.121372	0.0404574	3
