# Supplementary material for: Activity regulates a cell type-specific mitochondrial phenotype in zebrafish lateral line hair cells
Source: eLife. 2023 Mar 13;12:e80468. doi: 10.7554/eLife.80468 (PMC10129330; doi:10.7554/eLife.80468)
Supplement: Figure 4—source data 1. [file elife-80468-fig4-data1.xlsx]

## Sheet: Figure 4B-G
	Stereo length (um)	Total Mitochondrial Volume (um3)	Cell Volume (um3)	Mito volume:Cell Volume	Number of mitos	Median Mito volume (um3)	Max mito volume (um3)	Max mito z-score
02010_3dpf_C_left_HC1	1.53252	12.2002	196.948	0.0619462	18	0.322891	2.94816	2.85304
02010_3dpf_C_left_HC2	1.886	18.1514	217.323	0.0835225	32	0.326044	3.54637	4.10388
02010_3dpf_C_left_HC5	1.36884	12.4562	182.091	0.0684063	28	0.284707	1.88445	3.04981
02010_3dpf_C_left_HC6	2.58462	18.1466	229.547	0.0790541	27	0.437214	2.99433	3.42006
02010_3dpf_C_left_HC3	0.60483	6.50766	139.043	0.0468032	19	0.259292	1.52451	3.29434
02010_3dpf_C_left_HC4	0.45401	7.41685	139.574	0.0531392	15	0.146936	2.13443	2.58127
021020_3dpfA_Right_HC1	0.78	12.2002	226.998	0.0537458	26	0.224284	6.14679	4.29475
021020_3dpfA_Right_HC2	0.85547	18.1514	248.16	0.0731438	28	0.297789	7.53086	4.94366
021020_3dpfA_Right_HC3	0.52711	12.4562	248.209	0.0501842	36	0.254896	4.59708	5.2584
021020_3dpfA_Right_HC4	1.8932	18.1466	253.045	0.0717131	33	0.274782	4.99898	4.5787
021020_3dpfA_Right_HC5	0.79564	13.3027	226.968	0.0586106	19	0.309185	5.09258	3.78476
021020_3dpfA_Right_HC6	0.14431	12.6784	212.99	0.0595257	18	0.453632	2.18432	2.06928
03052021_Left_A_HC1	2.14485	12.914	197.11	0.0655165	28	0.191386	4.18669	4.78255
03052021_Left_A_HC2	1.58236	8.74731	163.849	0.0533864	19	0.220229	2.57018	3.39537
03052021_Left_A_HC3	2.4529	17.1821	215.896	0.0795851	26	0.284076	6.65759	4.60236
03052021_Left_A_HC4	2.81181	19.7587	214.083	0.0922945	29	0.288455	7.50417	4.921
03052021_Left_A_HC5	0.95061	9.20318	166.693	0.0552103	35	0.154425	1.74885	3.80861
03052021_Left_A_HC6	1.67566	16.2361	200.779	0.0808654	28	0.356618	4.49736	4.44761
03052021_Left_A_HC7	2.46674	11.4771	178.388	0.0643377	29	0.267473	1.92213	3.60615
03052021_Left_A_HC8	1.39367	12.7642	198.709	0.0642357	37	0.251459	1.46639	3.43558
03052021_Left_A_HC9	2.21957	20.46	217.818	0.0939317	11	0.381633	14.9802	2.99378
03052021_Left_A_HC10	1.69296	12.7087	179.631	0.0707492	35	0.282814	2.06825	4.38049
03052021_Left_A_HC11	1.52854	7.92121	161.289	0.0491119	15	0.200132	1.65324	1.90739
03052021_Left_A_HC12	1.26089	10.9543	175.909	0.0622727	39	0.205037	1.32748	4.00284
03052021_Right_A_HC1	2.54692	17.4877			51	0.225984	2.48612	5.52266
03052021_Right_A_HC2	1.52435	11.1911			21	0.343869	2.63549	3.66695
03052021_Right_A_HC3	0.71465	10.9826			18	0.21704	4.92017	3.55035
03052021_Right_A_HC4	2.06359	15.4463			38	0.254176	2.23835	4.2288
03052021_Right_A_HC5	2.57969	22.897			34	0.470431	3.83471	3.00377
03052021_Right_A_HC6	2.22846	17.8342			25	0.178606	8.03602	4.58592
03052021_Right_A_HC7	2.7043	20.6178			26	0.18824	12.8195	4.85779
03052021_Right_A_HC8	1.89448	12.9293			31	0.217283	2.9645	4.44855
03052021_Right_A_HC9	1.61013	10.2496			29	0.183208	1.24727	2.49443
03052021_Right_A_HC10	0.74008	7.33768			16	0.329798	1.4768	2.38788
03052021_Right_S02_C_HC1	2.80903	14.6075			25	0.251869	2.32832	2.81987
03052021_Right_S02_C_HC2	2.58142	14.6518			34	0.308396	2.45363	4.34144
03052021_Right_S02_C_HC3	3.03744	25.3073			32	0.464314	5.02396	4.25302
03052021_Right_S02_C_HC4	3.50214	28.9992			48	0.226111	10.0408	6.47521
03052021_Right_S02_C_HC7	2.51508	13.1417	187.409	0.0701231	29	0.218536	2.92351	3.52622
03052021_Right_S02_C_HC9	3.50356	23.4532	268.607	0.0873142	44	0.242733	3.45073	4.23265
03052021_Right_S02_C_HC12	4.07221	24.6128			33	0.286724	4.84824	3.63057
03052021_Right_S02_C_HC13	4.23131	23.4212	251.729	0.0930413	32	0.259994	12.1225	5.40527
03052021_Right_S02_C_HC14	3.74575	23.6339			35	0.266125	7.61674	5.29956
03052021_Right_S02_C_HC15	2.13587	10.9502	210.227	0.0520875	30	0.18536	1.99261	3.75979
03052021_Right_S02_C_HC16	1.95181	13.7086	210.471	0.0651328	38	0.201317	2.30656	4.02478
03052021_Right_S02_C_HC17	3.43561	22.6978	258.673	0.0877472	36	0.282937	5.82482	4.98223
03052021_Right_S02_C_HC18	3.03182	37.8376	324.651	0.116548	44	0.469561	11.8631	6.09732
03052021_Right_S02_C_HC19	2.2485	25.4409	266.592	0.0954302	45	0.276626	5.04265	5.12854
03052021_Right_S02_C_HC20	2.23016	15.6803	221.553	0.0707747	32	0.220577	6.39746	5.28332
03052021_Right_S02_C_HC23	1.95616	13.2692			50	0.19636	0.975173	3.33591
6dpf_Right_HC1	2.99767	13.5097	172.015	0.0785379	43	0.166155	2.70118	5.51583
6dpf_Right_HC2	1.71466	9.43882	150.268	0.0628131	43	0.157707	1.07504	3.97797
6dpf_Right_HC3	1.78086	6.95027	134.86	0.0515371	29	0.163495	0.732384	2.55339
6dpf_Right_HC4	2.40936	10.8792	147.617	0.0736986	54	0.169111	0.774508	3.97869
6dpf_Right_HC5	2.9678	12.4227	169.979	0.0730839	59	0.147878	1.79686	6.23281
6dpf_Right_HC6	1.7758	11.2808	154.175	0.0731689	53	0.168543	1.02077	4.23244
6dpf_Right_HC7	2.97096	20.4823	201.337	0.101732	55	0.150489	2.34757	3.71327
6dpf_Right_HC8	2.00794	6.46953	124.028	0.0521618	27	0.197154	0.830998	2.78726
6dpf_Right_HC9	3.25203	17.7742	226.401	0.0785077	42	0.146863	4.34064	5.34428
6dpf_Right_HC10	2.77711	20.4287	223.512	0.0913989	46	0.174409	7.29039	6.31382
6dpf_Right_HC11	1.61627	10.647	180.64	0.0589401	65	0.116063	0.724368	3.72594
6dpf_Right_HC12	1.93877	10.0052	173.611	0.0576301	35	0.233047	0.967723	2.97174
6dpf_Right_HC13	1.17912	7.71218	159.112	0.0484703	19	0.256664	2.67056	3.74055
6dpf_Right_HC14	1.36199	8.32225	157.419	0.052867	22	0.232701	2.03437	3.37259
6dpf_Left_HC1	3.40024	24.098			49	0.237123	3.1637	4.44778
6dpf_Left_HC2	2.42933	11.0754			46	0.184261	0.703191	2.47769
6dpf_Left_HC3	3.68808	16.6472			38	0.20323	3.95216	4.72608
6dpf_Left_HC4	3.09532	13.5391			54	0.146169	1.32307	4.02965
6dpf_Left_HC5	1.29121	5.71924			21	0.271928	0.654561	2.51713
6dpf_Left_HC7	3.22889	20.1315			58	0.232432	1.59191	3.68105
6dpf_Left_HC8	1.97294	12.3309			54	0.158859	1.34972	4.64236
6dpf_Left_HC10	2.536	12.0188			46	0.156654	1.78803	5.15932
6dpf_Left_HC11	1.63873	8.18715			29	0.158487	1.57863	4.27532
6dpf_Left_HC12	1.81937	11.1863			75	0.0893474	0.756636	4.10414
6dpf_Left_HC13	1.76052	6.70934			33	0.147759	0.802483	3.1327
6dpf_Left_HC14	0.54573	5.95658			19	0.1686	2.0259	3.77855
6dpf_Left_HC15	1.41408	5.91456			26	0.121968	1.01677	2.97814

## Sheet: Figure 4H-I
In order of stereo length		Percentage of max mito
	stereo length (um)	0-25	25-50	50-75	75-100
021020_3dpfA_Right_HC6	0.14431	6.45161	69.3548	24.1935	0
021020_3dpfA_Right_HC3	0.52711	0	18.1818	34.6723	47.1459
021020_3dpfA_Right_HC1	0.78	4.10256	41.5385	5.12821	49.2308
021020_3dpfA_Right_HC5	0.79564	65.4174	32.0273	2.55537	0
021020_3dpfA_Right_HC2	0.85547	7.37387	35.705	37.5162	19.4049
02010_3dpf_C_left_HC5	1.36884	69.3396	26.4151	4.24528	0
02010_3dpf_C_left_HC1	1.53252	27.6923	67.1795	5.12821	0
02010_3dpf_C_left_HC2	1.886	55.9271	37.0821	6.99088	0
021020_3dpfA_Right_HC4	1.8932	12.3596	19.382	14.0449	54.2135
02010_3dpf_C_left_HC6	2.58462	0	24.9201	25.2396	49.8403

## Sheet: Figure 4J
3 dpf	75-100%	WT	75-100%
021020_3dpfA_Right_HC6	0	6dpf_Left_HC14	0
021020_3dpfA_Right_HC3	47.1459	0305R HC3	21.9966
021020_3dpfA_Right_HC1	49.2308	0305R HC10	0
021020_3dpfA_Right_HC5	0	0305L HC5	0
021020_3dpfA_Right_HC2	19.4049	6dpf_Right_HC13	0
02010_3dpf_C_left_HC5	0	0305L HC12	0
02010_3dpf_C_left_HC1	0	6dpf_Left_HC5	0
02010_3dpf_C_left_HC2	0	6dpf_Right_HC14	1.0582
021020_3dpfA_Right_HC4	54.2135	0305L HC8	50.5
02010_3dpf_C_left_HC6	49.8403	6dpf_Left_HC15	84.6939
		0305R HC2	32.7273
		0305L HC11	82.3834
		0305L HC2	50
		0305L HC9	50.5
		6dpf_Right_HC11	87.5
		6dpf_Left_HC11	70.3226
		0305L HC6	57.1429
		0305L HC10	46.6882
		6dpf_Right_HC2	80.3571
		6dpf_Left_HC13	0
		6dpf_Right_HC6	97.4359
		6dpf_Right_HC3	0
		6dpf_Left_HC12	41.5094
		0305R HC8	20.9738
		6dpf_Right_HC12	0
		0305RSO2HC16	100
		0305RSO2HC23	100
		6dpf_Left_HC8	100
		6dpf_Right_HC8	0
		0305R HC4	60.9375
		0305RSO2HC15	0
		0305L HC1	38.6207
		0305R HC9	100
		0305R HC6	59.6899
		0305RSO2HC20	52.1226
		0305RSO2HC19	100
		6dpf_Right_HC4	90.9091
		6dpf_Left_HC2	0
		0305L HC3	60.6625
		0305L HC7	21.4286
		0305RSO2HC7	58.7302
		6dpf_Left_HC10	86.6667
		0305R HC1	72.4868
		0305R HC5	0
		0305RSO2HC2	76.9585
		0305R HC7	32.0909
		6dpf_Right_HC10	78.9272
		0305RSO2HC1	32.6633
		0305L HC4	49.1949
		6dpf_Right_HC5	49.1304
		6dpf_Right_HC7	100
		6dpf_Right_HC1	97.3568
		0305RSO2HC18	74.5046
		0305RSO2HC3	8.25959
		6dpf_Left_HC4	88.8889
		6dpf_Left_HC7	98.6047
		6dpf_Right_HC9	52.1212
		6dpf_Left_HC1	91.0714
		0305RSO2HC17	74.4132
		0305RSO2HC4	90.5605
		0305RSO2HC9	78.3674
		6dpf_Left_HC3	55.8621
		0305RSO2HC14	74.4986
		0305RSO2HC12	84.8781
		0305RSO2HC13	67.8816
