# Supplementary material for: Activity regulates a cell type-specific mitochondrial phenotype in zebrafish lateral line hair cells
Source: eLife. 2023 Mar 13;12:e80468. doi: 10.7554/eLife.80468 (PMC10129330; doi:10.7554/eLife.80468)
Supplement: Figure 5—figure supplement 1—source data 1. [file elife-80468-fig5-figsupp1-data1.xlsx]

## Sheet: Figure 6S1-B
TMRE AU
WT	opa
210.712	299.439
240.633	195.195
310.512	274.422
247.409	303.719
361.342	212.499
244.834	182.86
286.574	134.055
156.078	234.635
204.966	150.992
364.798	137.914
382.707
344.982

## Sheet: Figure 6S1-C
mitoGCaMP fluorrescence at baseline
WT/het	opa
2314.7	2804.57
2382.96	2874.04
2288.71	2799.57
1847.45	2472.38
2842.57	3033.63
2630.06	2667.72
2430.27	2716.34
1739.46	1749.34
1512.43	1802.04
1574.52	1705.84
1525.99	1615.34
1486.98	1734.25
2176.59	1539.93
2288.62	1641.67
2337.32	1392.83
1610.23	2601.41
1645.8	2112.1
1434.6	2322.14
	1585.91
	1355.56
