# Supplementary material for: Activity regulates a cell type-specific mitochondrial phenotype in zebrafish lateral line hair cells
Source: eLife. 2023 Mar 13;12:e80468. doi: 10.7554/eLife.80468 (PMC10129330; doi:10.7554/eLife.80468)
Supplement: Figure 5—source data 1. [file elife-80468-fig5-data1.xlsx]

## Sheet: Figure5B and C
	Number of mitos	Total mitochondrial volume (um3)
Opa1126HC1	83	11.0973
Opa1126HC2	136	13.7754
Opa1126HC3	195	21.14
Opa1126HC5	215	22.9204
Opa1126HC6	149	13.3753
03052021_Left_A_HC1	28	12.914
03052021_Left_A_HC2	19	8.74731
03052021_Left_A_HC3	26	17.1821
03052021_Left_A_HC4	29	19.7587
03052021_Left_A_HC5	35	9.20318
03052021_Left_A_HC6	28	16.2361
03052021_Left_A_HC7	29	11.4771
03052021_Left_A_HC8	37	12.7642
03052021_Left_A_HC9	11	20.46
03052021_Left_A_HC10	35	12.7087
03052021_Left_A_HC11	15	7.92121
03052021_Left_A_HC12	39	10.9543
03052021_Right_A_HC1	51	17.4877
03052021_Right_A_HC2	21	11.1911
03052021_Right_A_HC3	18	10.9826
03052021_Right_A_HC4	38	15.4463
03052021_Right_A_HC5	34	22.897
03052021_Right_A_HC6	25	17.8342
03052021_Right_A_HC7	26	20.6178
03052021_Right_A_HC8	31	12.9293
03052021_Right_A_HC9	29	10.2496
03052021_Right_A_HC10	16	7.33768
03052021_Right_S02_C_HC1	25	14.6075
03052021_Right_S02_C_HC2	34	14.6518
03052021_Right_S02_C_HC3	32	25.3073
03052021_Right_S02_C_HC4	48	28.9992
03052021_Right_S02_C_HC7	29	13.1417
03052021_Right_S02_C_HC9	44	23.4532
03052021_Right_S02_C_HC12	33	24.6128
03052021_Right_S02_C_HC13	32	23.4212
03052021_Right_S02_C_HC14	35	23.6339
03052021_Right_S02_C_HC15	30	10.9502
03052021_Right_S02_C_HC16	38	13.7086
03052021_Right_S02_C_HC17	36	22.6978
03052021_Right_S02_C_HC18	44	37.8376
03052021_Right_S02_C_HC19	45	25.4409
03052021_Right_S02_C_HC20	32	15.6803
03052021_Right_S02_C_HC23	50	13.2692
6dpf_Right_HC1	43	13.5097
6dpf_Right_HC2	43	9.43882
6dpf_Right_HC3	29	6.95027
6dpf_Right_HC4	54	10.8792
6dpf_Right_HC5	59	12.4227
6dpf_Right_HC6	53	11.2808
6dpf_Right_HC7	55	20.4823
6dpf_Right_HC8	27	6.46953
6dpf_Right_HC9	42	17.7742
6dpf_Right_HC10	46	20.4287
6dpf_Right_HC11	65	10.647
6dpf_Right_HC12	35	10.0052
6dpf_Right_HC13	19	7.71218
6dpf_Right_HC14	22	8.32225
6dpf_Left_HC1	49	24.098
6dpf_Left_HC2	46	11.0754
6dpf_Left_HC3	38	16.6472
6dpf_Left_HC4	54	13.5391
6dpf_Left_HC5	21	5.71924
6dpf_Left_HC7	58	20.1315
6dpf_Left_HC8	54	12.3309
6dpf_Left_HC10	46	12.0188
6dpf_Left_HC11	29	8.18715
6dpf_Left_HC12	75	11.1863
6dpf_Left_HC13	33	6.70934
6dpf_Left_HC14	19	5.95658
6dpf_Left_HC15	26	5.91456

## Sheet: Figure 5F
CytoRGECO (deltaF/F0)
Time (sec)	1108F1C3C1	1108F1C3C2	1108F1C3C3	1108F1C4C1	1108F2C6C1	1108F2C6C2	1108F2C8C1	1108F5C20C1	1108F5C20C2	1108F5C20C3	1108F9C35C2	1122F1C2C1	1122F3C5C1	1122F3C5C2	1122F3C7C1	1122F12C25C1	1122F12C25C2	1122F12C26C1
0	0.00634	0.002306	0.000198	-0.01702	-0.00647	-0.0107	-0.00187	-0.00219	0.002742	-0.00018	-0.00869	-0.00099	0.002463	-0.00386	0.015309	0.003954	-0.00349	-0.00945
3	-0.00994	-0.00568	-0.00515	-0.01283	-0.00146	0.007414	-0.0019	0.001967	0.000784	0.001814	-0.00038	0.001033	-0.00167	-0.00039	-0.00468	0.002409	0.002501	-0.00223
6	-0.0709	0.036178	0.0451	0.029478	-0.00673	-0.03814	-0.00476	0.030534	0.023412	0.010579	0.013609	0.012354	0.091331	0.075512	0.014107	0.026711	0.034839	0.034596
9	-0.01091	0.112022	0.128548	0.07603	0.063371	-0.02621	0.064129	0.058582	0.039689	0.016744	0.040055	0.073897	0.20234	0.204674	0.056844	0.070704	0.110263	0.092427
12	0.018883	0.107253	0.1345	0.081192	0.130558	0.075499	0.104512	0.065795	0.049939	0.027715	0.056725	0.08125	0.232697	0.246466	0.070897	0.10486	0.154998	0.115771
15	0.052074	0.124072	0.168313	0.085862	0.11854	0.079355	0.085263	0.054951	0.040061	0.023051	0.063457	0.105732	0.237549	0.254091	0.077423	0.123511	0.183433	0.147281
18	0.033371	0.125161	0.17219	0.087775	0.113346	0.092127	0.088651	0.048784	0.03855	0.017715	0.053789	0.102903	0.208437	0.204453	0.082146	0.113737	0.187118	0.13293
21	0.012902	0.120275	0.170858	0.081403	0.117613	0.097774	0.091572	0.044839	0.036842	0.019427	0.048005	0.095541	0.217032	0.21552	0.074171	0.105601	0.190421	0.157517
24	0.00081	0.115591	0.171019	0.07387	0.108902	0.107151	0.085335	0.042362	0.025981	0.009918	0.057237	0.099357	0.194575	0.191362	0.067657	0.101024	0.208841	0.158491
27	0.013711	0.050278	0.112479	0.030919	0.094485	0.107439	0.06689	0.017074	0.022024	-0.00474	0.037281	0.057829	0.138652	0.136694	0.058306	0.07196	0.18857	0.136226
30	-0.02065	0.003938	0.0566	0.018532	0.072046	0.081437	0.034406	0.00721	0.013156	0.00258	0.009778	0.03056	0.090872	0.074164	0.021737	0.034905	0.164658	0.085578
33	-0.02753	-0.00198	0.032426	0.004815	0.044798	0.057423	0.016594	0.003368	0.013124	-0.00535	0.007146	0.034976	0.085279	0.062622	0.011981	0.011581	0.13871	0.069069
36	-0.02966	-0.0071	0.020712	0.012538	0.032183	0.038936	0.011133	0.001359	0.001504	-0.00948	0.003129	0.017166	0.076533	0.051671	0.002262	-0.00427	0.121128	0.062602
39	-0.00113	-0.02584	0.004221	0.001123	0.028432	0.018079	0.003161	0.010078	0.001302	-0.00533	0.005044	0.019209	0.079488	0.041864	0.000894	-0.02237	0.079117	0.027875
42	0.001393	-0.03856	-0.01005	-0.01323	0.008509	0.009803	0.000292	0.003882	0.017124	-0.00703	0.000702	0.021415	0.087366	0.055903	0.006907	-0.03489	0.059919	0.019431
45	-0.0195	-0.03429	-0.00352	-0.02295	0.001105	0.004631	0.000147	0.006884	0.013981	-0.007	0.010705	0.011028	0.080424	0.046046	-0.01803	-0.03337	0.068067	0.021881
48	-0.04226	-0.03039	-0.00325	-0.01929	0.014092	0.013219	-0.01536	-0.00902	0.013651	-0.00756	-0.016	0.030892	0.07477	0.037818	-0.02822	-0.04183	0.062934	0.023739
51	-0.048	-0.03529	-0.01182	-0.01662	0.027672	0.024284	-0.01298	-0.00215	0.014006	-0.0074	-0.00635	0.011147	0.072642	0.041292	-0.01327	-0.05532	0.053757	0.013163
mitoGCaMP (delta F/F0)
0	0.023056	0.020481	0.015581	-0.01696	-0.00371	0.002102	-0.00195	-0.01025	-0.01405	-0.00691	0.003212	0.001322	0.011191	0.021941	0.010424	0.009651	0.001948	-0.00023
3	-0.00649	-0.00342	-0.00386	0.002551	0.00043	0.001408	0.005529	-0.00097	0.004957	0.00117	-0.00943	0.003221	-0.00711	-0.00702	-0.00653	-0.00433	-0.00127	-0.00526
6	-0.06523	0.009151	0.030565	0.018907	0.029419	-0.11835	-0.0124	0.025122	0.006988	0.025589	-0.01316	0.019473	0.030393	0.044231	-0.01447	-0.00506	0.003832	0.002201
9	-0.05022	0.049291	0.076916	0.035953	0.08576	-0.17706	0.026712	0.067242	0.041501	0.071623	0.007548	0.041133	0.083638	0.07678	0.027563	-0.01105	0.029656	0.038966
12	-0.00044	0.062965	0.098579	0.077628	0.18515	-0.07667	0.074834	0.092036	0.069342	0.086336	0.034651	0.079428	0.135701	0.132212	0.057876	0.011011	0.052269	0.06248
15	0.051698	0.083842	0.127066	0.104669	0.184856	-0.04533	0.073707	0.083318	0.065859	0.077357	0.044747	0.135671	0.185954	0.174036	0.075692	0.02545	0.06998	0.086598
18	0.059455	0.099303	0.144828	0.13201	0.226748	0.014353	0.091814	0.067826	0.058392	0.057512	0.064623	0.141462	0.190691	0.169054	0.092751	0.015309	0.06677	0.082716
21	0.059424	0.116729	0.170064	0.166969	0.296048	0.092994	0.110452	0.071657	0.050216	0.056892	0.081118	0.146198	0.211144	0.194092	0.096842	0.002904	0.067255	0.092219
24	0.055633	0.1283	0.191297	0.173717	0.339673	0.169366	0.100494	0.070972	0.052138	0.050484	0.083743	0.14658	0.210123	0.192982	0.082699	0.016726	0.093448	0.104509
27	0.090171	0.117139	0.168598	0.163856	0.333613	0.342874	0.102485	0.0667	0.049518	0.04217	0.080346	0.139498	0.187663	0.149847	0.086999	0.009776	0.085328	0.101804
30	0.089704	0.109755	0.15639	0.161762	0.343522	0.431511	0.092296	0.063373	0.053598	0.044545	0.087466	0.146833	0.182148	0.130935	0.056301	0.011594	0.090564	0.12102
33	0.076635	0.1004	0.148314	0.152452	0.318124	0.436202	0.081699	0.049424	0.04661	0.035625	0.088719	0.149408	0.177411	0.135282	0.056957	-0.00571	0.086987	0.109946
36	0.068866	0.099068	0.141843	0.16217	0.317669	0.45502	0.085373	0.036327	0.032727	0.026833	0.080896	0.127541	0.167939	0.126839	0.043151	-0.00636	0.081788	0.115729
39	0.083734	0.082961	0.115894	0.148987	0.292818	0.447939	0.069447	0.038534	0.047158	0.025375	0.093141	0.129649	0.156884	0.131636	0.041693	-0.01266	0.069055	0.104933
42	0.089563	0.073423	0.106172	0.14247	0.277243	0.439207	0.051842	0.046035	0.048957	0.028555	0.08921	0.13736	0.163339	0.136226	0.044131	-0.0353	0.053535	0.096199
45	0.076657	0.078781	0.116506	0.141529	0.251047	0.414161	0.049675	0.034911	0.041983	0.010527	0.098995	0.134277	0.149146	0.12826	0.017615	-0.03376	0.060478	0.094108
48	0.049585	0.076218	0.122606	0.140618	0.268306	0.422892	0.040206	0.024246	0.0336	0.019415	0.072538	0.129517	0.13668	0.119407	0.021586	-0.05036	0.056487	0.073036
51	0.044318	0.082363	0.125583	0.12978	0.264179	0.428719	0.036778	0.02625	0.036366	0.00751	0.072599	0.128941	0.134132	0.116617	0.019906	-0.05905	0.041289	0.063327

## Sheet: Figure 5G
Time (sec)	CytoRGECO (deltaF/F0)
	1108F3C11C1	1108F3C11C2	1108F3C11C3	1108F6C24C1	1108F7C28C1	1108F7C28C2	1108F7C28C3	1108F10C37C1	1108F11C39C1	1108F11C40C1	1108F11C40C2	1122F4C8C1	1122F9C19C1	1122F9C19C2	1122F9C20C1	1122F11C23C1	1122F11C23C2	1122F11C23C3	1122F14C29C1	1122F14C29C2
0	0.006086	-0.00091	0.004083	-0.00803	-0.00801	-0.00555	-0.00919	0.01105	-0.00608	0.001315	0.008738	-0.01148	-0.00158	-0.00388	-0.00477	-0.00736	-0.00767	-0.01621	-0.00709	-0.00206
3	-0.00562	-0.00711	-0.00058	-0.00199	0.000267	0.002397	0.0014	0.002241	0.005747	-0.0004	0.005	0.005189	-0.00011	0.0006	0.000925	-0.001	-0.00283	0.00254	-0.00062	0.001127
6	0.020607	0.024325	0.007284	0.011378	-0.0065	0.032171	0.006413	0.039847	0.011642	0.026102	0.039074	0.044371	0.011893	0.020537	-0.00382	0.011995	0.025483	0.019733	0.01744	0.025933
9	0.070257	0.084889	0.044327	0.047843	0.033629	0.094633	0.064516	0.083874	0.05	0.056033	0.059599	0.071473	0.060925	0.081335	0.011071	0.095799	0.076624	0.074937	0.039108	0.052567
12	0.053353	0.079276	0.056741	0.063258	0.074882	0.11707	0.08881	0.100335	0.061283	0.072427	0.071796	0.098449	0.070136	0.104228	0.022897	0.13236	0.103072	0.101926	0.046406	0.060378
15	0.054574	0.09006	0.060495	0.051753	0.076727	0.102718	0.077507	0.098299	0.066163	0.084152	0.083909	0.081498	0.079103	0.112068	0.029941	0.138238	0.112944	0.120185	0.049163	0.07622
18	0.070726	0.098567	0.075752	0.046072	0.072286	0.092576	0.073542	0.092593	0.062426	0.06071	0.065607	0.080298	0.074042	0.104358	0.064898	0.137449	0.116975	0.122971	0.050985	0.083489
21	0.062786	0.091871	0.075678	0.035825	0.051999	0.07376	0.04772	0.109534	0.075849	0.073574	0.077195	0.078874	0.078465	0.119351	0.048592	0.153101	0.124298	0.125078	0.047796	0.082492
24	0.057345	0.082135	0.060963	0.040741	0.050056	0.06186	0.045616	0.099696	0.070386	0.07283	0.083612	0.076299	0.080655	0.12266	0.048239	0.14749	0.131076	0.141298	0.043835	0.084359
27	0.022814	0.04799	0.049149	0.051856	0.055914	0.05954	0.046648	0.057746	0.05507	0.052341	0.056599	0.055809	0.041931	0.080803	0.055884	0.089164	0.102051	0.125577	0.046561	0.083406
30	0.0072	0.023407	0.02719	0.033691	0.026845	0.026316	0.014727	0.053491	0.029684	0.019757	0.029473	0.049093	0.019737	0.059552	0.043663	0.031726	0.068951	0.086899	0.032032	0.066652
33	0.00959	0.015723	0.023403	0.01813	0.019362	0.015779	0.00439	0.038503	0.030145	0.021954	0.028671	0.034817	0.013448	0.037087	0.05882	0.013273	0.063751	0.081079	0.015948	0.058396
36	0.007144	0.021714	0.023756	0.028841	0.011881	0.001328	-0.01441	0.026754	0.016284	0.024	0.032642	0.027184	-0.00071	0.009794	0.050515	0.00405	0.063158	0.072097	-0.0062	0.043346
39	-0.00059	0.011981	0.001057	0.01754	0.003914	-0.00408	-0.01624	0.02874	0.024713	0.024906	0.028522	0.02244	0.015296	0.012715	0.033816	-0.00891	0.041709	0.051649	-0.00176	0.038524
42	-0.00166	0.018546	0.009897	0.012035	0.004756	-0.00342	-0.01364	0.023434	0.023452	0.008047	0.015539	0.033914	-0.00123	-0.00284	0.043315	-0.0039	0.02516	0.03749	-0.01344	0.036098
45	0.00676	0.02084	0.01272	0.011721	0.014341	0.005944	-0.00836	0.024633	0.026138	0.013933	0.024174	0.014138	0.009086	0.011768	0.036524	-0.01245	0.016768	0.034706	-0.01486	0.04141
48	0.011862	0.018298	0.024162	-0.0022	0.001322	-0.00601	-0.01731	0.022939	0.012962	0.006064	0.012254	0.018778	0.004077	0.002843	0.031995	-0.00746	0.006984	0.028605	-0.01859	0.041934
51	-0.0136	-0.0072	0.007071	-0.00102	-0.00623	-0.01463	-0.02664	0.025385	0.015937	0.008405	0.016624	0.033303	-0.01743	-0.02041	0.016204	0.012958	0.026252	0.038603	-0.02214	0.033447
	mitoGCaMP (deltaF/F0)
0	0.007136	0.001138	0.0047	0.000775	0.00045	0.001337	0.001947	0.001794	-0.00243	0.011413	0.014991	-0.00504	0.012043	0.009966	0.007014	-0.01362	-0.01736	-0.01483	0.000916	0.008007
3	0.000214	0.002123	0.00459	-0.00102	8.65e-05	0.000965	7.01e-05	-0.00472	-0.00244	0.000865	-0.00046	-0.00046	0.000739	-0.00145	-0.00113	-0.00684	-0.00351	-0.00324	-0.0049	-0.00018
6	0.044184	0.051491	0.033865	0.022565	-0.00541	0.012667	0.016647	-0.00136	-0.0002	-0.01109	-0.00396	0.024889	-0.01463	-6e-05	-0.00976	-0.01596	-0.00361	-0.00091	-0.00237	0.012778
9	0.098892	0.10232	0.093439	0.053804	-0.02313	0.018853	0.029004	-0.00476	0.008052	-0.0177	0.003471	0.036837	-0.01486	0.024535	-0.00462	-0.01915	0.002621	0.012684	-0.01072	0.010089
12	0.06661	0.066707	0.066439	0.068311	-0.02692	0.021699	0.039239	0.014114	0.010874	-0.013	0.01546	0.035572	-0.02214	0.01866	-0.01275	0.018023	0.008852	0.027862	-0.029	0.001568
15	0.059977	0.058471	0.060902	0.039467	-0.03441	0.004254	0.013617	0.016677	0.025301	0.012869	0.043529	0.026702	-0.01805	0.0349	-0.01453	0.041967	0.021776	0.045182	-0.03086	0.000502
18	0.07242	0.055091	0.071316	0.017254	-0.01295	0.002411	0.023753	0.015293	0.039642	0.015842	0.045207	0.020955	-0.0337	0.021595	0.008671	0.048902	0.019239	0.046166	-0.03121	0.004503
21	0.071444	0.059207	0.071314	0.00792	-0.02012	-0.00474	0.013751	0.032016	0.045211	0.024546	0.05398	0.012471	-0.0228	0.039803	0.003647	0.076218	0.033034	0.06352	-0.03911	-0.00181
24	0.058794	0.043603	0.063573	-0.00151	-0.02355	-0.01047	0.007229	0.056352	0.053007	0.031714	0.061685	0.009616	-0.03251	0.035101	0.004461	0.053466	0.021165	0.056725	-0.04194	0.002508
27	0.033332	0.014084	0.038977	-0.02055	-0.00888	-0.00248	0.024673	0.071961	0.053313	0.052987	0.060541	-0.00099	-0.0239	0.021131	0.008273	0.063248	0.0165	0.056417	-0.03227	0.005585
30	0.027439	-0.00742	0.026352	-0.02512	-0.02463	-0.01629	0.003586	0.079812	0.040652	0.062722	0.063188	-0.0045	-0.03335	0.006126	0.025478	0.043525	0.002507	0.052262	-0.03596	0.006142
33	0.026124	-0.00227	0.021974	-0.02935	-0.03004	-0.01512	0.00088	0.080561	0.027987	0.063809	0.064133	-0.01014	-0.03184	0.003488	0.032294	0.030884	-0.00775	0.052237	-0.03344	0.012134
36	0.024442	-0.00154	0.026109	-0.0392	-0.02925	-0.0115	0.003562	0.074496	0.024688	0.053348	0.051329	-0.02099	-0.03601	-0.00825	0.02821	0.027572	-0.00604	0.062866	-0.03333	0.014545
39	0.024793	-0.00203	0.022437	-0.04575	-0.0302	-0.00837	-0.00032	0.075727	0.025423	0.064946	0.057694	-0.00777	-0.04221	-0.02256	0.015912	0.022034	-0.00209	0.065534	-0.03784	0.010588
42	0.035385	0.010325	0.029485	-0.04711	-0.02231	0.002777	0.009876	0.080458	0.023838	0.04756	0.033836	-0.00633	-0.05414	-0.02541	0.031232	0.000145	-0.01414	0.055813	-0.04546	0.006332
45	0.044799	0.023166	0.050498	-0.04332	-0.02237	0.002949	0.00936	0.069602	0.011918	0.057763	0.044793	-0.01204	-0.05483	-0.01981	0.02623	-0.00223	-0.00984	0.053694	-0.04582	0.010038
48	0.043631	0.011474	0.050631	-0.04969	-0.03532	-0.00609	0.012234	0.069503	0.006798	0.051934	0.049669	-0.02434	-0.05369	-0.03236	0.024068	-0.00234	0.000609	0.047698	-0.04626	0.010432
51	0.040436	0.002835	0.048791	-0.06631	-0.04183	-0.01553	0.012783	0.075252	0.010988	0.056504	0.052761	-0.01486	-0.0897	-0.05921	0.002832	0.007746	0.005416	0.043662	-0.05126	0.006435

## Sheet: Figure 5H-K
Peak RGECO			Integrated area RGECO			Peak mitoGCaMP			Integrated mitoGCaMP
WT/het	opa		WT/het	opa		WT/het	opa		WT/het	opa
0.052074	0.070726		-0.1331	0.447939		0.0901712	0.0988921		0.796119	0.780053
0.125161	0.098567		0.597334	0.725213		0.1283	0.10232		1.38675	0.488785
0.17219	0.075752		1.16647	0.559054		0.191297	0.0934393		2.05294	0.785392
0.087775	0.063258		0.396014	0.45156		0.173717	0.0683111		2.03906	-0.158833
0.130558	0.076727		0.970602	0.490857		0.343522	0.000450133		4.0109	-0.390792
0.107439	0.11707		0.742085	0.676297		0.45502	0.0216993		3.68134	-0.0226908
0.104512	0.08881		0.609953	0.370611		0.110452	0.0392389		1.07899	0.221894
0.065795	0.109534		0.370751	0.961395		0.0920359	0.0805614		0.852754	0.802775
0.049939	0.075849		0.357368	0.623599		0.0693417	0.0533132		0.725861	0.402618
0.027715	0.084152		0.0632	0.626076		0.0863361	0.0649464		0.660608	0.567031
0.063457	0.083909		0.357647	0.755702		0.0989954	0.0641331		1.06096	0.711847
0.105732	0.098449		0.790009	0.809765		0.149408	0.0368374		1.93751	0.0595916
0.237549	0.080655		2.22016	0.559727		0.211144	0.0120431		2.50707	-0.565546
0.254091	0.12266		1.99303	0.861201		0.194092	0.0398027		2.17335	0.0461893
0.082146	0.064898		0.499885	0.573322		0.0968423	0.0322944		0.811177	0.175542
0.123511	0.153101		0.600942	0.927636		0.0254496	0.0762184		-0.121218	0.373594
0.208841	0.131076		1.98809	1.07439		0.0934485	0.0330343		1.0094	0.0673791
0.158491	0.141298		1.25595	1.22863		0.12102	0.0655338		1.3443	0.723345
	0.050985			0.318726			0.00091556			-0.55085
	0.084359			0.916335			0.0145448			0.1202
