# Supplementary material for: Activity regulates a cell type-specific mitochondrial phenotype in zebrafish lateral line hair cells
Source: eLife. 2023 Mar 13;12:e80468. doi: 10.7554/eLife.80468 (PMC10129330; doi:10.7554/eLife.80468)
Supplement: Figure 6—figure supplement 1—source data 1. [file elife-80468-fig6-figsupp1-data1.xlsx]

## Sheet: Sheet1
	Stereo length (um)	Total mito volume (um3)	Total Ribbon Volume (um3)	Average Ribbon Volume (um3)	Number of Ribbons	Max Mito distance to ribbons (um)	Median mito distance to ribbons (um)
sput_B_SO1_LeftHC1	3.23892	15.2938	0.500515	0.0834192	6	4.57491	5.28909
sput_B_SO1_LeftHC2	2.28636	12.2071	0.244404	0.0349149	7	1.76728	1.94624
sput_B_SO1_LeftHC3	2.49051	16.8175	0.467925	0.093585	5	2.55524	5.95447
sput_B_SO1_LeftHC4	2.97565	15.8393	0.282948	0.0565896	5	1.17146	10.1353
sput_B_SO1_LeftHC5	2.69068	17.2429	0.304566	0.0609131	5	1.22585	7.44449
sput_B_SO1_RightHC1	1.42237	13.4488	0.46436	0.0928719	5	1.44966	4.79167
sput_B_SO1_RightHC2	2.80013	13.6751	0.435604	0.108901	4	0.507252	6.37763
sput_B_SO1_RightHC3	2.1653	11.5052	0.404276	0.0808553	5	0.834093	8.27462
sput_B_SO1_RightHC4	3.31028	15.0453	0.391483	0.0978708	4	1.8324	0.888967
sput_B_SO1_RightHC5	2.44857	13.1873	0.386142	0.0965354	4	1.27176	5.22854
04222022_SputBIO3_Left_HC1	1.78638	11.6905	0.216993	0.0542482	4	0.537142	6.46056
04222022_SputBIO3_Left_HC2	1.64977	9.90407	0.1945	0.0648334	3	0.505661	3.80294
04222022_SputBIO3_Left_HC3	2.63754	21.8356	0.711881	0.118647	6	0.691376	6.25336
04222022_SputBIO3_Left_HC4	3.19796	20.8937	0.656317	0.164079	4	0.5309	6.8094
04222022_SputBIO3_Left_HC5	2.90665	17.4587	0.44414	0.111035	4	1.68557	7.14745
04222022_SputBIO3_Left_HC6	3.06562	16.3436	0.521866	0.130467	4	1.0947	7.7888
04042022_SputASO1_Right_HC1	0.30923	10.9336	0.131097	0.043699	3	6.2883	5.38225
04042022_SputASO1_Right_HC2	0.82227	16.3199	0.532482	0.088747	6	3.34391	4.48245
04042022_SputASO1_Right_HC3	0.16718	8.29818	0.087555	0.0218888	4	4.47381	5.47621
03052021_Left_A_HC1			0.63187	0.126374	5
03052021_Left_A_HC2			0.363777	0.0727554	5
03052021_Left_A_HC3			0.751621	0.12527	6
03052021_Left_A_HC4			0.799301	0.133217	6
03052021_Left_A_HC5			0.42281	0.0528512	8
03052021_Left_A_HC6			0.74307	0.123845	6
03052021_Left_A_HC7			0.501068	0.100214	5
03052021_Left_A_HC8			0.617191	0.0881701	7
03052021_Left_A_HC9			0.636639	0.127328	5
03052021_Left_A_HC10			0.677384	0.0846729	8
03052021_Left_A_HC11			0.245466	0.0490932	5
03052021_Left_A_HC12			0.506727	0.056303	9
03052021_Right_A_HC1			0.824361	0.137393	6
03052021_Right_A_HC2			0.565761	0.0942935	6
03052021_Right_A_HC3			0.493979	0.0987957	5
03052021_Right_A_HC4			0.850892	0.121556	7
03052021_Right_A_HC5			0.855676	0.142613	6
03052021_Right_A_HC6			0.868691	0.144782	6
03052021_Right_A_HC7			0.969533	0.161589	6
03052021_Right_A_HC8			0.617326	0.0881895	7
03052021_Right_A_HC9			0.538052	0.0768646	7
03052021_Right_A_HC10			0.173097	0.0346193	5
03052021_Right_S02_C_HC1			0.446451	0.111613	4
03052021_Right_S02_C_HC2			0.494348	0.164783	3
03052021_Right_S02_C_HC3			0.804093	0.160819	5
03052021_Right_S02_C_HC4			1.01615	0.203229	5
03052021_Right_S02_C_HC7			0.522909	0.130727	4
03052021_Right_S02_C_HC9			0.794527	0.264842	3
03052021_Right_S02_C_HC12			0.814517	0.162903	5
03052021_Right_S02_C_HC13			0.854916	0.170983	5
03052021_Right_S02_C_HC14			0.76315	0.254383	3
03052021_Right_S02_C_HC15			0.413737	0.0689562	6
03052021_Right_S02_C_HC16			0.710093	0.142019	5
03052021_Right_S02_C_HC17			0.893534	0.178707	5
03052021_Right_S02_C_HC18			0.910884	0.182177	5
03052021_Right_S02_C_HC19			0.791391	0.197848	4
03052021_Right_S02_C_HC20			0.650036	0.130007	5
03052021_Right_S02_C_HC23			0.584726	0.0974543	6
6dpf_Right_HC1			0.666651	0.111108	6
6dpf_Right_HC2			0.605569	0.100928	6
6dpf_Right_HC3			0.294445	0.0736112	4
6dpf_Right_HC4			0.432401	0.0864803	5
6dpf_Right_HC5			0.604863	0.100811	6
6dpf_Right_HC6			0.716253	0.0895316	8
6dpf_Right_HC7			0.838612	0.119802	7
6dpf_Right_HC8			0.237413	0.0593533	4
6dpf_Right_HC9			0.823588	0.137265	6
6dpf_Right_HC10			0.829703	0.118529	7
6dpf_Right_HC11			0.478852	0.119713	4
6dpf_Right_HC12			0.362991	0.0907476	4
6dpf_Right_HC13			0.19392	0.0646399	3
6dpf_Right_HC14			0.167654	0.0279424	6
6dpf_Left_HC1			1.09568	0.182613	6
6dpf_Left_HC2			0.680109	0.136022	5
6dpf_Left_HC3			0.761458	0.152292	5
6dpf_Left_HC4			0.517685	0.103537	5
6dpf_Left_HC5			0.320523	0.0641046	5
6dpf_Left_HC7			0.612095	0.102016	6
6dpf_Left_HC8			0.688262	0.0983231	7
6dpf_Left_HC10			0.480003	0.0800005	6
6dpf_Left_HC11			0.347393	0.0434241	8
6dpf_Left_HC12			0.619873	0.0885533	7
6dpf_Left_HC13			0.260353	0.0520706	5
6dpf_Left_HC14			0.124894	0.0208157	6
6dpf_Left_HC15			0.121372	0.0404574	3
