# Supplementary material for: Activity regulates a cell type-specific mitochondrial phenotype in zebrafish lateral line hair cells
Source: eLife. 2023 Mar 13;12:e80468. doi: 10.7554/eLife.80468 (PMC10129330; doi:10.7554/eLife.80468)
Supplement: Figure 6—source data 1. [file elife-80468-fig6-data1.xlsx]

## Sheet: Figure 6B-G
	Stereo length (um)	Total Mitochondrial Volume (um3)	Cell Volume (um3)	Mito volume:Cell Volume	Number of mitos	Median Mito volume (um3)	Max mito volume (um3)	Max mito z-score
sput_B_SO1_LeftHC1	3.23892	15.2938	219.358	0.0697207	24	0.637242	2.35429	2.58667
sput_B_SO1_LeftHC2	2.28636	12.2071	204.853	0.0595899	12	1.01726	4.01521	2.70048
sput_B_SO1_LeftHC3	2.49051	16.8175	249.048	0.0675271	17	0.989266	3.37564	2.32508
sput_B_SO1_LeftHC4	2.97565	15.8393	230.371	0.0687554	12	1.31994	5.21843	2.03997
sput_B_SO1_LeftHC5	2.69068	17.2429	257.764	0.0668941	12	1.43691	5.96141	2.32554
sput_B_SO1_RightHC1	1.42237	13.4488	222	0.0605802	20	0.672442	2.72033	3.08416
sput_B_SO1_RightHC2	2.80013	13.6751	198.306	0.0689597	23	0.594571	4.19202	3.89816
sput_B_SO1_RightHC3	2.1653	11.5052	185.642	0.0619753	14	0.821803	8.23469	3.46239
sput_B_SO1_RightHC4	3.31028	15.0453	209.831	0.071702	23	0.654144	3.54545	4.08403
sput_B_SO1_RightHC5	2.44857	13.1873	165.457	0.0797025	30	0.439578	1.37458	2.8131
04222022_SputBIO3_Left_HC1	1.78638	11.6905	205.408	0.0569136	18	0.649473	2.43359	2.35084
04222022_SputBIO3_Left_HC2	1.64977	9.90407	186.441	0.0531217	22	0.450185	1.59397	2.44851
04222022_SputBIO3_Left_HC3	2.63754	21.8356	251.391	0.0868591	23	0.949376	5.24334	4.06911
04222022_SputBIO3_Left_HC4	3.19796	20.8937	243.565	0.085783	18	1.16076	7.98868	3.68153
04222022_SputBIO3_Left_HC5	2.90665	17.4587	356.336	0.048995	29	0.602024	3.43151	3.59724
04222022_SputBIO3_Left_HC6	3.06562	16.3436	244.069	0.0669632	29	0.563574	2.80461	3.74027
04042022_SputASO1_Right_HC1	0.30923	10.9336			13	0.841043	3.16696	2.72399
04042022_SputASO1_Right_HC2	0.82227	16.3199	245.703	0.0664211	23	0.709559	2.62152	2.39176
04042022_SputASO1_Right_HC3	0.16718	8.29818			14	0.592727	1.61148	1.89199
03052021_Left_A_HC1	2.14485	12.914	197.11	0.0655165	28	0.191386	4.18669	4.78255
03052021_Left_A_HC2	1.58236	8.74731	163.849	0.0533864	19	0.220229	2.57018	3.39537
03052021_Left_A_HC3	2.4529	17.1821	215.896	0.0795851	26	0.284076	6.65759	4.60236
03052021_Left_A_HC4	2.81181	19.7587	214.083	0.0922945	29	0.288455	7.50417	4.921
03052021_Left_A_HC5	0.95061	9.20318	166.693	0.0552103	35	0.154425	1.74885	3.80861
03052021_Left_A_HC6	1.67566	16.2361	200.779	0.0808654	28	0.356618	4.49736	4.44761
03052021_Left_A_HC7	2.46674	11.4771	178.388	0.0643377	29	0.267473	1.92213	3.60615
03052021_Left_A_HC8	1.39367	12.7642	198.709	0.0642357	37	0.251459	1.46639	3.43558
03052021_Left_A_HC9	2.21957	20.46	217.818	0.0939317	11	0.381633	14.9802	2.99378
03052021_Left_A_HC10	1.69296	12.7087	179.631	0.0707492	35	0.282814	2.06825	4.38049
03052021_Left_A_HC11	1.52854	7.92121	161.289	0.0491119	15	0.200132	1.65324	1.90739
03052021_Left_A_HC12	1.26089	10.9543	175.909	0.0622727	39	0.205037	1.32748	4.00284
03052021_Right_A_HC1	2.54692	17.4877			51	0.225984	2.48612	5.52266
03052021_Right_A_HC2	1.52435	11.1911			21	0.343869	2.63549	3.66695
03052021_Right_A_HC3	0.71465	10.9826			18	0.21704	4.92017	3.55035
03052021_Right_A_HC4	2.06359	15.4463			38	0.254176	2.23835	4.2288
03052021_Right_A_HC5	2.57969	22.897			34	0.470431	3.83471	3.00377
03052021_Right_A_HC6	2.22846	17.8342			25	0.178606	8.03602	4.58592
03052021_Right_A_HC7	2.7043	20.6178			26	0.18824	12.8195	4.85779
03052021_Right_A_HC8	1.89448	12.9293			31	0.217283	2.9645	4.44855
03052021_Right_A_HC9	1.61013	10.2496			29	0.183208	1.24727	2.49443
03052021_Right_A_HC10	0.74008	7.33768			16	0.329798	1.4768	2.38788
03052021_Right_S02_C_HC1	2.80903	14.6075			25	0.251869	2.32832	2.81987
03052021_Right_S02_C_HC2	2.58142	14.6518			34	0.308396	2.45363	4.34144
03052021_Right_S02_C_HC3	3.03744	25.3073			32	0.464314	5.02396	4.25302
03052021_Right_S02_C_HC4	3.50214	28.9992			48	0.226111	10.0408	6.47521
03052021_Right_S02_C_HC7	2.51508	13.1417	187.409	0.0701231	29	0.218536	2.92351	3.52622
03052021_Right_S02_C_HC9	3.50356	23.4532	268.607	0.0873142	44	0.242733	3.45073	4.23265
03052021_Right_S02_C_HC12	4.07221	24.6128			33	0.286724	4.84824	3.63057
03052021_Right_S02_C_HC13	4.23131	23.4212	251.729	0.0930413	32	0.259994	12.1225	5.40527
03052021_Right_S02_C_HC14	3.74575	23.6339			35	0.266125	7.61674	5.29956
03052021_Right_S02_C_HC15	2.13587	10.9502	210.227	0.0520875	30	0.18536	1.99261	3.75979
03052021_Right_S02_C_HC16	1.95181	13.7086	210.471	0.0651328	38	0.201317	2.30656	4.02478
03052021_Right_S02_C_HC17	3.43561	22.6978	258.673	0.0877472	36	0.282937	5.82482	4.98223
03052021_Right_S02_C_HC18	3.03182	37.8376	324.651	0.116548	44	0.469561	11.8631	6.09732
03052021_Right_S02_C_HC19	2.2485	25.4409	266.592	0.0954302	45	0.276626	5.04265	5.12854
03052021_Right_S02_C_HC20	2.23016	15.6803	221.553	0.0707747	32	0.220577	6.39746	5.28332
03052021_Right_S02_C_HC23	1.95616	13.2692			50	0.19636	0.975173	3.33591
6dpf_Right_HC1	2.99767	13.5097	172.015	0.0785379	43	0.166155	2.70118	5.51583
6dpf_Right_HC2	1.71466	9.43882	150.268	0.0628131	43	0.157707	1.07504	3.97797
6dpf_Right_HC3	1.78086	6.95027	134.86	0.0515371	29	0.163495	0.732384	2.55339
6dpf_Right_HC4	2.40936	10.8792	147.617	0.0736986	54	0.169111	0.774508	3.97869
6dpf_Right_HC5	2.9678	12.4227	169.979	0.0730839	59	0.147878	1.79686	6.23281
6dpf_Right_HC6	1.7758	11.2808	154.175	0.0731689	53	0.168543	1.02077	4.23244
6dpf_Right_HC7	2.97096	20.4823	201.337	0.101732	55	0.150489	2.34757	3.71327
6dpf_Right_HC8	2.00794	6.46953	124.028	0.0521618	27	0.197154	0.830998	2.78726
6dpf_Right_HC9	3.25203	17.7742	226.401	0.0785077	42	0.146863	4.34064	5.34428
6dpf_Right_HC10	2.77711	20.4287	223.512	0.0913989	46	0.174409	7.29039	6.31382
6dpf_Right_HC11	1.61627	10.647	180.64	0.0589401	65	0.116063	0.724368	3.72594
6dpf_Right_HC12	1.93877	10.0052	173.611	0.0576301	35	0.233047	0.967723	2.97174
6dpf_Right_HC13	1.17912	7.71218	159.112	0.0484703	19	0.256664	2.67056	3.74055
6dpf_Right_HC14	1.36199	8.32225	157.419	0.052867	22	0.232701	2.03437	3.37259
6dpf_Left_HC1	3.40024	24.098			49	0.237123	3.1637	4.44778
6dpf_Left_HC2	2.42933	11.0754			46	0.184261	0.703191	2.47769
6dpf_Left_HC3	3.68808	16.6472			38	0.20323	3.95216	4.72608
6dpf_Left_HC4	3.09532	13.5391			54	0.146169	1.32307	4.02965
6dpf_Left_HC5	1.29121	5.71924			21	0.271928	0.654561	2.51713
6dpf_Left_HC7	3.22889	20.1315			58	0.232432	1.59191	3.68105
6dpf_Left_HC8	1.97294	12.3309			54	0.158859	1.34972	4.64236
6dpf_Left_HC10	2.536	12.0188			46	0.156654	1.78803	5.15932
6dpf_Left_HC11	1.63873	8.18715			29	0.158487	1.57863	4.27532
6dpf_Left_HC12	1.81937	11.1863			75	0.0893474	0.756636	4.10414
6dpf_Left_HC13	1.76052	6.70934			33	0.147759	0.802483	3.1327
6dpf_Left_HC14	0.54573	5.95658			19	0.1686	2.0259	3.77855
6dpf_Left_HC15	1.41408	5.91456			26	0.121968	1.01677	2.97814

## Sheet: Figure6H-I
In order of stereo length		Percentage of max mito
	stereo length (um)	0-25	25-50	50-75	75-100
04042022_SputASO1_Right_HC3	0.16718	27.8351	54.6392	9.27835	8.24742
04042022_SputASO1_Right_HC1	0.30923	100	0	0	0
04042022_SputASO1_Right_HC2	0.82227	100	0	0	0
sput_B_SO1_RightHC1	1.42237	37.2093	36.6279	24.4186	1.74419
04222022_SputBIO3_Left_HC2	1.64977	0	34.9398	25.3012	39.759
04222022_SputBIO3_Left_HC1	1.78638	0	10.2041	27.8912	61.9048
sput_B_SO1_RightHC3	2.1653	15.3846	20.3297	25.8242	38.4615
sput_B_SO1_LeftHC2	2.28636	7.65027	30.0546	26.776	35.5191
sput_B_SO1_RightHC5	2.44857	0	18.254	30.1587	51.5873
sput_B_SO1_LeftHC3	2.49051	3.44828	40.2299	44.2529	12.069
04222022_SputBIO3_Left_HC3	2.63754	0	5.73566	27.4314	66.8329
sput_B_SO1_LeftHC5	2.69068	0.273224	48.3607	35.2459	16.1202
sput_B_SO1_RightHC2	2.80013	4	40.8	12	43.2
04222022_SputBIO3_Left_HC5	2.90665	2.85714	62.449	17.1429	17.551
sput_B_SO1_LeftHC4	2.97565	12.0755	42.2642	24.9057	20.7547
04222022_SputBIO3_Left_HC6	3.06562	6.95652	50.4348	17.8261	24.7826
04222022_SputBIO3_Left_HC4	3.19796	1.21951	2.56098	30.4878	65.7317
sput_B_SO1_LeftHC1	3.23892	24.5283	66.0377	9.43396	0
sput_B_SO1_RightHC4	3.31028	32.3741	41.3669	21.223	5.03597

## Sheet: Figure 6J
cdh23	75-100%	WT	75-100%
04042022_SputASO1_Right_HC3	8.24742	6dpf_Left_HC14	0
04042022_SputASO1_Right_HC1	0	0305R HC3	21.9966
04042022_SputASO1_Right_HC2	0	0305R HC10	0
sput_B_SO1_RightHC1	1.74419	0305L HC5	0
04222022_SputBIO3_Left_HC2	39.759	6dpf_Right_HC13	0
04222022_SputBIO3_Left_HC1	61.9048	0305L HC12	0
sput_B_SO1_RightHC3	38.4615	6dpf_Left_HC5	0
sput_B_SO1_LeftHC2	35.5191	6dpf_Right_HC14	1.0582
sput_B_SO1_RightHC5	51.5873	0305L HC8	50.5
sput_B_SO1_LeftHC3	12.069	6dpf_Left_HC15	84.6939
04222022_SputBIO3_Left_HC3	66.8329	0305R HC2	32.7273
sput_B_SO1_LeftHC5	16.1202	0305L HC11	82.3834
sput_B_SO1_RightHC2	43.2	0305L HC2	50
04222022_SputBIO3_Left_HC5	17.551	0305L HC9	50.5
sput_B_SO1_LeftHC4	20.7547	6dpf_Right_HC11	87.5
04222022_SputBIO3_Left_HC6	24.7826	6dpf_Left_HC11	70.3226
04222022_SputBIO3_Left_HC4	65.7317	0305L HC6	57.1429
sput_B_SO1_LeftHC1	0	0305L HC10	46.6882
sput_B_SO1_RightHC4	5.03597	6dpf_Right_HC2	80.3571
		6dpf_Left_HC13	0
		6dpf_Right_HC6	97.4359
		6dpf_Right_HC3	0
		6dpf_Left_HC12	41.5094
		0305R HC8	20.9738
		6dpf_Right_HC12	0
		0305RSO2HC16	100
		0305RSO2HC23	100
		6dpf_Left_HC8	100
		6dpf_Right_HC8	0
		0305R HC4	60.9375
		0305RSO2HC15	0
		0305L HC1	38.6207
		0305R HC9	100
		0305R HC6	59.6899
		0305RSO2HC20	52.1226
		0305RSO2HC19	100
		6dpf_Right_HC4	90.9091
		6dpf_Left_HC2	0
		0305L HC3	60.6625
		0305L HC7	21.4286
		0305RSO2HC7	58.7302
		6dpf_Left_HC10	86.6667
		0305R HC1	72.4868
		0305R HC5	0
		0305RSO2HC2	76.9585
		0305R HC7	32.0909
		6dpf_Right_HC10	78.9272
		0305RSO2HC1	32.6633
		0305L HC4	49.1949
		6dpf_Right_HC5	49.1304
		6dpf_Right_HC7	100
		6dpf_Right_HC1	97.3568
		0305RSO2HC18	74.5046
		0305RSO2HC3	8.25959
		6dpf_Left_HC4	88.8889
		6dpf_Left_HC7	98.6047
		6dpf_Right_HC9	52.1212
		6dpf_Left_HC1	91.0714
		0305RSO2HC17	74.4132
		0305RSO2HC4	90.5605
		0305RSO2HC9	78.3674
		6dpf_Left_HC3	55.8621
		0305RSO2HC14	74.4986
		0305RSO2HC12	84.8781
		0305RSO2HC13	67.8816
