# Supplementary material for: Activity regulates a cell type-specific mitochondrial phenotype in zebrafish lateral line hair cells
Source: eLife. 2023 Mar 13;12:e80468. doi: 10.7554/eLife.80468 (PMC10129330; doi:10.7554/eLife.80468)
Supplement: Figure 7—source data 1. [file elife-80468-fig7-data1.xlsx]

## Sheet: Figure 7B-G
	Stereo length (um)	Total Mitochondrial Volume (um3)	Cell Volume (um3)	Mito volume:Cell Volume	Number of mitos	Median Mito volume (um3)	Max mito volume (um3)	Max mito z-score
CaVRight_HC1	1.80458	11.2957	211.338	0.0534484	24	0.349697	1.6589	1.6589
CaVRight_HC2	3.06327	25.8976	324.715	0.0797549	59	0.298032	1.73602	1.73602
CaVRight_HC3	1.55056	10.4183	204.64	0.0509102	22	0.347446	1.91929	1.91929
CaVRight_HC4	2.36864	26.4006	285.308	0.0925337	72	0.261072	1.55816	1.55816
CaVRight_HC5	2.49027	18.0855	275.032	0.0657578	40	0.218634	4.28089	4.28089
CaVRight_HC7	2.56868	24.9139	282.571	0.0881688	41	0.441112	2.26701	2.26701
CaVRight_HC8	2.16317	20.6003	288.181	0.071484	42	0.352308	2.89631	2.89631
CaVRight_HC9	1.55052	10.3469	205.774	0.0502828	20	0.322966	2.0276	2.0276
CaVRight_HC11	2.51369	16.2894	261.346	0.0623288	26	0.22748	2.80049	2.80049
CaVRight_HC13	0.60706	5.29191	147.792	0.0358064	5	0.979639	2.115	2.115
CaVLeft_HC1	2.5129	16.6842	249.535	0.066861	28	0.40434	2.80503	2.80503
CaVLeft_HC2	2.24103	16.794	233.879	0.071806	41	0.275138	1.39983	1.39983
CaVLeft_HC3	2.77354	17.5757	262.178	0.0670374	38	0.236073	4.65213	4.65213
CaVLeft_HC4	2.78267	22.2535	267.733	0.0831183	58	0.294797	1.68968	1.68968
CaVLeft_HC5	1.86543	11.5554	200.228	0.057711	29	0.25064	1.8139	1.8139
CaVLeft_HC6	2.72553	24.6888	270.083	0.091412	66	0.292881	2.16627	2.16627
CaVLeft_HC7	2.55438	25.5549	306.591	0.0833518	55	0.366105	2.48957	2.48957
CaVLeft_HC8	2.50879	23.3833	316.188	0.0739538	64	0.277784	1.38318	1.38318
CaVLeft_HC9	2.40542	15.8185	255.389	0.061939	37	0.227545	2.03496	2.03496
CaVLeft_HC10	1.82508	12.4586	236.85	0.0526012	27	0.396819	1.58506	1.58506
CaVLeft_HC11	2.50741	23.238	360.968	0.064377	40	0.339506	3.98169	3.98169
CaVLeft_HC12	2.4904	14.0756	244.657	0.0575319	24	0.163017	3.06866	3.06866
CaVLeft_HC13	1.9102	11.8279	215.599	0.0548609	21	0.418628	3.26993	3.26993
CaVLeft_HC14	2.04138	6.75389	160.393	0.0421084	19	0.230029	1.21063	1.21063
CaVLeft_HC15	1.84316	11.2295	*	*	31	0.240316	1.30469	1.30469
CaVLeft_HC16	1.2523	8.8839	214.926	0.0413346	12	0.652385	1.59855	1.59855
CaVLeft_HC17	1.10803	8.7461	214.574	0.0407604	12	0.401419	3.80297	3.80297
CaV1.3B_Right_HC1	2.13498	12.2184			25	0.242999	2.00368	2.00368
CaV1.3B_Right_HC2	1.48802	9.14425			13	0.535548	2.79587	2.79587
CaV1.3B_Right_HC3	1.96769	14.583			29	0.202692	3.39821	3.39821
CaV1.3B_Right_HC4	2.68466	15.9384			14	0.26544	10.2093	10.2093
CaV1.3B_Right_HC5	3.54319	27.098			71	0.308212	1.37374	1.37374
CaV1.3B_Right_HC6	1.33433	8.18142			18	0.337136	1.57843	1.57843
CaV1.3B_Right_HC8	3.56038	20.5072			42	0.24874	3.37877	3.37877
CaV1.3B_Right_HC11	2.38676	14.6798			23	0.290567	2.68762	2.68762
CaV1.3B_Right_HC12	1.49001	12.2674			28	0.271924	1.67408	1.67408
CaV1.3B_Right_HC13	1.48228	23.3519			45	0.317433	2.97134	2.97134
CaV1.3B_Right_HC14	2.21498	12.3026			34	0.206378	1.63257	1.63257
CaV1.3B_Right_HC15	1.89909	13.5338			36	0.208317	1.99358	1.99358
CaV1.3B_Right_HC17	2.72109	21.6959			34	0.424819	3.91738	3.91738
CaV1.3B_Left_HC1	1.9406	9.80454			21	0.227229	1.84717	1.84717
CaV1.3B_Left_HC2	2.59529	9.88649			13	0.272799	2.77033	2.77033
CaV1.3B_Left_HC3	2.53771	10.901			15	0.370945	5.14154	5.14154
CaV1.3B_Left_HC4	2.04446	9.66359			16	0.328104	2.34265	2.34265
CaV1.3B_Left_HC9	3.3775	17.2644	264.297	0.065322	48	0.269682	3.63236	3.63236
CaV1.3B_Left_HC10	3.65051	32.713	309.879	0.105567	96	0.305712	1.58851	1.58851
CaV1.3B_Left_HC12	3.8919	32.0866			90	0.257276	1.7966	1.7966
CaV1.3B_Left_HC17	1.30321	6.8931			11	0.356885	3.22447	3.22447
03052021_Left_A_HC1	2.14485	12.914	197.11	0.0655165	28	0.191386	4.18669	4.78255
03052021_Left_A_HC2	1.58236	8.74731	163.849	0.0533864	19	0.220229	2.57018	3.39537
03052021_Left_A_HC3	2.4529	17.1821	215.896	0.0795851	26	0.284076	6.65759	4.60236
03052021_Left_A_HC4	2.81181	19.7587	214.083	0.0922945	29	0.288455	7.50417	4.921
03052021_Left_A_HC5	0.95061	9.20318	166.693	0.0552103	35	0.154425	1.74885	3.80861
03052021_Left_A_HC6	1.67566	16.2361	200.779	0.0808654	28	0.356618	4.49736	4.44761
03052021_Left_A_HC7	2.46674	11.4771	178.388	0.0643377	29	0.267473	1.92213	3.60615
03052021_Left_A_HC8	1.39367	12.7642	198.709	0.0642357	37	0.251459	1.46639	3.43558
03052021_Left_A_HC9	2.21957	20.46	217.818	0.0939317	11	0.381633	14.9802	2.99378
03052021_Left_A_HC10	1.69296	12.7087	179.631	0.0707492	35	0.282814	2.06825	4.38049
03052021_Left_A_HC11	1.52854	7.92121	161.289	0.0491119	15	0.200132	1.65324	1.90739
03052021_Left_A_HC12	1.26089	10.9543	175.909	0.0622727	39	0.205037	1.32748	4.00284
03052021_Right_A_HC1	2.54692	17.4877			51	0.225984	2.48612	5.52266
03052021_Right_A_HC2	1.52435	11.1911			21	0.343869	2.63549	3.66695
03052021_Right_A_HC3	0.71465	10.9826			18	0.21704	4.92017	3.55035
03052021_Right_A_HC4	2.06359	15.4463			38	0.254176	2.23835	4.2288
03052021_Right_A_HC5	2.57969	22.897			34	0.470431	3.83471	3.00377
03052021_Right_A_HC6	2.22846	17.8342			25	0.178606	8.03602	4.58592
03052021_Right_A_HC7	2.7043	20.6178			26	0.18824	12.8195	4.85779
03052021_Right_A_HC8	1.89448	12.9293			31	0.217283	2.9645	4.44855
03052021_Right_A_HC9	1.61013	10.2496			29	0.183208	1.24727	2.49443
03052021_Right_A_HC10	0.74008	7.33768			16	0.329798	1.4768	2.38788
03052021_Right_S02_C_HC1	2.80903	14.6075			25	0.251869	2.32832	2.81987
03052021_Right_S02_C_HC2	2.58142	14.6518			34	0.308396	2.45363	4.34144
03052021_Right_S02_C_HC3	3.03744	25.3073			32	0.464314	5.02396	4.25302
03052021_Right_S02_C_HC4	3.50214	28.9992			48	0.226111	10.0408	6.47521
03052021_Right_S02_C_HC7	2.51508	13.1417	187.409	0.0701231	29	0.218536	2.92351	3.52622
03052021_Right_S02_C_HC9	3.50356	23.4532	268.607	0.0873142	44	0.242733	3.45073	4.23265
03052021_Right_S02_C_HC12	4.07221	24.6128			33	0.286724	4.84824	3.63057
03052021_Right_S02_C_HC13	4.23131	23.4212	251.729	0.0930413	32	0.259994	12.1225	5.40527
03052021_Right_S02_C_HC14	3.74575	23.6339			35	0.266125	7.61674	5.29956
03052021_Right_S02_C_HC15	2.13587	10.9502	210.227	0.0520875	30	0.18536	1.99261	3.75979
03052021_Right_S02_C_HC16	1.95181	13.7086	210.471	0.0651328	38	0.201317	2.30656	4.02478
03052021_Right_S02_C_HC17	3.43561	22.6978	258.673	0.0877472	36	0.282937	5.82482	4.98223
03052021_Right_S02_C_HC18	3.03182	37.8376	324.651	0.116548	44	0.469561	11.8631	6.09732
03052021_Right_S02_C_HC19	2.2485	25.4409	266.592	0.0954302	45	0.276626	5.04265	5.12854
03052021_Right_S02_C_HC20	2.23016	15.6803	221.553	0.0707747	32	0.220577	6.39746	5.28332
03052021_Right_S02_C_HC23	1.95616	13.2692			50	0.19636	0.975173	3.33591
6dpf_Right_HC1	2.99767	13.5097	172.015	0.0785379	43	0.166155	2.70118	5.51583
6dpf_Right_HC2	1.71466	9.43882	150.268	0.0628131	43	0.157707	1.07504	3.97797
6dpf_Right_HC3	1.78086	6.95027	134.86	0.0515371	29	0.163495	0.732384	2.55339
6dpf_Right_HC4	2.40936	10.8792	147.617	0.0736986	54	0.169111	0.774508	3.97869
6dpf_Right_HC5	2.9678	12.4227	169.979	0.0730839	59	0.147878	1.79686	6.23281
6dpf_Right_HC6	1.7758	11.2808	154.175	0.0731689	53	0.168543	1.02077	4.23244
6dpf_Right_HC7	2.97096	20.4823	201.337	0.101732	55	0.150489	2.34757	3.71327
6dpf_Right_HC8	2.00794	6.46953	124.028	0.0521618	27	0.197154	0.830998	2.78726
6dpf_Right_HC9	3.25203	17.7742	226.401	0.0785077	42	0.146863	4.34064	5.34428
6dpf_Right_HC10	2.77711	20.4287	223.512	0.0913989	46	0.174409	7.29039	6.31382
6dpf_Right_HC11	1.61627	10.647	180.64	0.0589401	65	0.116063	0.724368	3.72594
6dpf_Right_HC12	1.93877	10.0052	173.611	0.0576301	35	0.233047	0.967723	2.97174
6dpf_Right_HC13	1.17912	7.71218	159.112	0.0484703	19	0.256664	2.67056	3.74055
6dpf_Right_HC14	1.36199	8.32225	157.419	0.052867	22	0.232701	2.03437	3.37259
6dpf_Left_HC1	3.40024	24.098			49	0.237123	3.1637	4.44778
6dpf_Left_HC2	2.42933	11.0754			46	0.184261	0.703191	2.47769
6dpf_Left_HC3	3.68808	16.6472			38	0.20323	3.95216	4.72608
6dpf_Left_HC4	3.09532	13.5391			54	0.146169	1.32307	4.02965
6dpf_Left_HC5	1.29121	5.71924			21	0.271928	0.654561	2.51713
6dpf_Left_HC7	3.22889	20.1315			58	0.232432	1.59191	3.68105
6dpf_Left_HC8	1.97294	12.3309			54	0.158859	1.34972	4.64236
6dpf_Left_HC10	2.536	12.0188			46	0.156654	1.78803	5.15932
6dpf_Left_HC11	1.63873	8.18715			29	0.158487	1.57863	4.27532
6dpf_Left_HC12	1.81937	11.1863			75	0.0893474	0.756636	4.10414
6dpf_Left_HC13	1.76052	6.70934			33	0.147759	0.802483	3.1327
6dpf_Left_HC14	0.54573	5.95658			19	0.1686	2.0259	3.77855
6dpf_Left_HC15	1.41408	5.91456			26	0.121968	1.01677	2.97814

## Sheet: Figure7H-I
In order of stereo length		Percentage of max mito
	stereo length (um)	0-25	25-50	50-75	75-100
CaV1.3B_Left_HC17	1.30321	10.6145	63.1285	13.4078	12.8492
CaV1.3B_Right_HC6	1.33433	0	0	24.1379	75.8621
CaV1.3B_Right_HC13	1.48228	0	0	0	100
CaV1.3B_Right_HC2	1.48802	45.4955	54.5045	0	0
CaV1.3B_Right_HC12	1.49001	0	0	0	100
CaVRight_HC9	1.55052	0	0	10.4167	89.5833
CaVRight_HC3	1.55056	0	32.0312	26.5625	41.4062
CaVRight_HC1	1.80458	0	56.4516	28.2258	15.3226
CaVLeft_HC10	1.82508	0	74.5283	25.4717	0
CaVLeft_HC15	1.84316	0	0	18.4466	81.5534
CaVLeft_HC5	1.86543	12.1622	41.8919	45.9459	0
CaV1.3B_Right_HC15	1.89909	0	0	4.34783	95.6522
CaVLeft_HC13	1.9102	0	10.5469	12.1094	77.3438
CaV1.3B_Left_HC1	1.9406	0	0	15.0943	84.9057
CaV1.3B_Right_HC3	1.96769	0	0	30.3371	69.6629
CaVLeft_HC14	2.04138	0	69.8925	30.1075	0
CaV1.3B_Left_HC4	2.04446	0	0	25.2033	74.7967
CaV1.3B_Right_HC1	2.13498	0	7.43243	55.4054	37.1622
CaVRight_HC8	2.16317	0	0	0	100
CaV1.3B_Right_HC14	2.21498	0	8.19672	52.459	39.3443
CaVLeft_HC2	2.24103	0	3.73832	85.0467	11.215
CaVRight_HC4	2.36864	0	0	0	100
CaV1.3B_Right_HC11	2.38676	0	0	8.40336	91.5966
CaVLeft_HC9	2.40542	0	0	29.7436	70.2564
CaVRight_HC5	2.49027	0	16.3158	17.6316	66.0526
CaVLeft_HC12	2.4904	0	3.8961	32.4675	63.6364
CaVLeft_HC11	2.50741	0	28.0899	16.1049	55.8052
CaVLeft_HC8	2.50879	0	7.5	43.75	48.75
CaVLeft_HC1	2.5129	0	3.7234	15.9574	80.3191
CaVRight_HC11	2.51369	23.8889	31.6667	26.1111	18.3333
CaV1.3B_Left_HC3	2.53771	5.67164	26.2687	18.806	49.2537
CaVLeft_HC7	2.55438	0	27.381	47.619	25
CaVRight_HC7	2.56868	0	0	4.86111	95.1389
CaV1.3B_Left_HC2	2.59529	0	63.1579	20.4678	16.3743
CaV1.3B_Right_HC4	2.68466	14.3855	49.4413	24.162	12.0112
CaV1.3B_Right_HC17	2.72109	0	0	9.77444	90.2256
CaVLeft_HC6	2.72553	0	0	0	100
CaVLeft_HC3	2.77354	7.20721	31.2312	46.8468	14.7147
CaVLeft_HC4	2.78267	0	0	13.5484	86.4516
CaVRight_HC2	3.06327	0	0	2.24719	97.7528
CaV1.3B_Left_HC9	3.3775	0	0	0	100
CaV1.3B_Right_HC5	3.54319	8	68	24	0
CaV1.3B_Right_HC8	3.56038	0	14.1176	55.2941	30.5882
CaV1.3B_Left_HC10	3.65051	0	0	38.2353	61.7647
CaV1.3B_Left_HC12	3.8919	0	0	0	100

## Sheet: Figure 7J
cav1.3a	75-100%	WT	75-100%
CaV1.3B_Left_HC17	12.8492	6dpf_Left_HC14	0
CaV1.3B_Right_HC6	75.8621	0305R HC3	21.9966
CaV1.3B_Right_HC13	100	0305R HC10	0
CaV1.3B_Right_HC2	0	0305L HC5	0
CaV1.3B_Right_HC12	100	6dpf_Right_HC13	0
CaVRight_HC9	89.5833	0305L HC12	0
CaVRight_HC3	41.4062	6dpf_Left_HC5	0
CaVRight_HC1	15.3226	6dpf_Right_HC14	1.0582
CaVLeft_HC10	0	0305L HC8	50.5
CaVLeft_HC15	81.5534	6dpf_Left_HC15	84.6939
CaVLeft_HC5	0	0305R HC2	32.7273
CaV1.3B_Right_HC15	95.6522	0305L HC11	82.3834
CaVLeft_HC13	77.3438	0305L HC2	50
CaV1.3B_Left_HC1	84.9057	0305L HC9	50.5
CaV1.3B_Right_HC3	75.2809	6dpf_Right_HC11	87.5
CaVLeft_HC14	0	6dpf_Left_HC11	70.3226
CaV1.3B_Left_HC4	74.7968	0305L HC6	57.1429
CaV1.3B_Right_HC1	37.1622	0305L HC10	46.6882
CaVRight_HC8	100	6dpf_Right_HC2	80.3571
CaV1.3B_Right_HC14	39.3443	6dpf_Left_HC13	0
CaVLeft_HC2	11.2149	6dpf_Right_HC6	97.4359
CaVRight_HC4	100	6dpf_Right_HC3	0
CaV1.3B_Right_HC11	91.5966	6dpf_Left_HC12	41.5094
CaVLeft_HC9	70.2564	0305R HC8	20.9738
CaVRight_HC5	66.0526	6dpf_Right_HC12	0
CaVLeft_HC12	63.6364	0305RSO2HC16	100
CaVLeft_HC11	55.8052	0305RSO2HC23	100
CaVLeft_HC8	48.75	6dpf_Left_HC8	100
CaVLeft_HC1	80.3191	6dpf_Right_HC8	0
CaVRight_HC11	18.3333	0305R HC4	60.9375
CaV1.3B_Left_HC3	49.2537	0305RSO2HC15	0
CaVLeft_HC7	25	0305L HC1	38.6207
CaVRight_HC7	95.1389	0305R HC9	100
CaV1.3B_Left_HC2	16.3743	0305R HC6	59.6899
CaV1.3B_Right_HC4	12.0112	0305RSO2HC20	52.1226
CaV1.3B_Right_HC17	90.2256	0305RSO2HC19	100
CaVLeft_HC6	100	6dpf_Right_HC4	90.9091
CaVLeft_HC3	14.7147	6dpf_Left_HC2	0
CaVLeft_HC4	86.4516	0305L HC3	60.6625
CaVRight_HC2	97.7528	0305L HC7	21.4286
CaV1.3B_Left_HC9	100	0305RSO2HC7	58.7302
CaV1.3B_Right_HC5	0	6dpf_Left_HC10	86.6667
CaV1.3B_Right_HC8	30.5882	0305R HC1	72.4868
CaV1.3B_Left_HC10	61.7647	0305R HC5	0
CaV1.3B_Left_HC12	100	0305RSO2HC2	76.9585
		0305R HC7	32.0909
		6dpf_Right_HC10	78.9272
		0305RSO2HC1	32.6633
		0305L HC4	49.1949
		6dpf_Right_HC5	49.1304
		6dpf_Right_HC7	100
		6dpf_Right_HC1	97.3568
		0305RSO2HC18	74.5046
		0305RSO2HC3	8.25959
		6dpf_Left_HC4	88.8889
		6dpf_Left_HC7	98.6047
		6dpf_Right_HC9	52.1212
		6dpf_Left_HC1	91.0714
		0305RSO2HC17	74.4132
		0305RSO2HC4	90.5605
		0305RSO2HC9	78.3674
		6dpf_Left_HC3	55.8621
		0305RSO2HC14	74.4986
		0305RSO2HC12	84.8781
		0305RSO2HC13	67.8816
