# Supplementary material for: Activity regulates a cell type-specific mitochondrial phenotype in zebrafish lateral line hair cells
Source: eLife. 2023 Mar 13;12:e80468. doi: 10.7554/eLife.80468 (PMC10129330; doi:10.7554/eLife.80468)
Supplement: Figure 8—figure supplement 1—source data 1. [file elife-80468-fig8-figsupp1-data1.xlsx]

## Sheet: Figure 8S1A
	kin length (um)	stereo length (um)
sput_B_SO1_LeftHC1	*	3.23892
sput_B_SO1_LeftHC2	*	2.28636
sput_B_SO1_LeftHC3	*	2.49051
sput_B_SO1_LeftHC4	*	2.97565
sput_B_SO1_LeftHC5	*	2.69068
sput_B_SO1_RightHC1	*	1.42237
sput_B_SO1_RightHC2	*	2.80013
sput_B_SO1_RightHC3	*	2.1653
sput_B_SO1_RightHC4	*	3.31028
sput_B_SO1_RightHC5	*	2.44857
04222022_SputBIO3_Left_HC1	4.32495	1.78638
04222022_SputBIO3_Left_HC2	3.99823	1.64977
04222022_SputBIO3_Left_HC3	19.3514	2.63754
04222022_SputBIO3_Left_HC4	7.29565	3.19796
04222022_SputBIO3_Left_HC5	11.7079	2.90665
04222022_SputBIO3_Left_HC6	12.4179	3.06562
04042022_SputASO1_Right_HC1	0.84959	0.30923
04042022_SputASO1_Right_HC2	1.6206	0.82227
04042022_SputASO1_Right_HC3	0.50249	0.16718

## Sheet: Figure 8S1B
	kin length (um)	stereo lenth (um)
CaVRight_HC1	13.629	1.80458
CaVRight_HC2	14.0607	3.06327
CaVRight_HC3	*	1.55056
CaVRight_HC4	15.8623	2.36864
CaVRight_HC5	12.5234	2.49027
CaVRight_HC7	15.9385	2.56868
CaVRight_HC8	12.4439	2.16317
CaVRight_HC9	4.12	1.55052
CaVRight_HC11	9.55762	2.51369
CaVRight_HC13	1.0056	0.60706
CaVLeft_HC1	7.52461	2.5129
CaVLeft_HC2	12.8285	2.24103
CaVLeft_HC3	12.7123	2.77354
CaVLeft_HC4	11.6417	2.78267
CaVLeft_HC5	9.94349	1.86543
CaVLeft_HC6	14.4883	2.72553
CaVLeft_HC7	12.1592	2.55438
CaVLeft_HC8	13.5234	2.50879
CaVLeft_HC9	13.4527	2.40542
CaVLeft_HC10	7.96712	1.82508
CaVLeft_HC11	17.603	2.50741
CaVLeft_HC12	12.4298	2.4904
CaVLeft_HC13	10.4014	1.9102
CaVLeft_HC14	4.95431	2.04138
CaVLeft_HC15	9.96952	1.84316
CaVLeft_HC16	0.84346	1.2523
CaVLeft_HC17	0.75213	1.10803
CaV1.3B_Right_HC1	14.1667	2.13498
CaV1.3B_Right_HC2	3.18064	1.48802
CaV1.3B_Right_HC3	5.42528	1.96769
CaV1.3B_Right_HC4	*	2.68466
CaV1.3B_Right_HC5	*	3.54319
CaV1.3B_Right_HC6	*	1.33433
CaV1.3B_Right_HC8	*	3.56038
CaV1.3B_Right_HC11	*	2.38676
CaV1.3B_Right_HC12	*	1.49001
CaV1.3B_Right_HC13	*	1.48228
CaV1.3B_Right_HC14	*	2.21498
CaV1.3B_Right_HC15	*	1.89909
CaV1.3B_Right_HC17	*	2.72109
CaV1.3B_Left_HC1	8.80035	1.9406
CaV1.3B_Left_HC2	7.5299	2.59529
CaV1.3B_Left_HC3	6.95525	2.53771
CaV1.3B_Left_HC4	7.39806	2.04446
CaV1.3B_Left_HC9	*	3.3775
CaV1.3B_Left_HC10	*	3.65051
CaV1.3B_Left_HC12	*	3.8919
CaV1.3B_Left_HC17	*	1.30321
