# Supplementary material for: Activity regulates a cell type-specific mitochondrial phenotype in zebrafish lateral line hair cells
Source: eLife. 2023 Mar 13;12:e80468. doi: 10.7554/eLife.80468 (PMC10129330; doi:10.7554/eLife.80468)
Supplement: Figure 8—source data 1. [file elife-80468-fig8-data1.xlsx]

## Sheet: Sheet1
HC name	kin_length	stereo_length	Genotype	Age	Number_mitos	Total_mito_volume	Max_Mito_stdev_from_mean	Max_Mito	Max_Mito_CL	Median_mito	Max_mito_to_ribbons	Med_mito_to_ribbons
02010_3dpf_C_left_HC1	4.47699	1.53252	WT	3	18	12.2002	2.85304	2.94816	22.0026	0.322891	4.41878	5.38803
02010_3dpf_C_left_HC2	9.13587	1.886	WT	3	32	18.1514	4.10388	3.54637	18.4143	0.326044	2.8694	2.35185
02010_3dpf_C_left_HC5	3.92725	1.36884	WT	3	28	12.4562	3.04981	1.88445	16.8813	0.284707	5.2959	5.9568
02010_3dpf_C_left_HC6	10.03	2.58462	WT	3	27	18.1466	3.42006	2.99433	20.2415	0.437214	0.76814	6.06908
021020_3dpfA_Right_HC1	4.88655	0.78	WT	3	26	17.2303	4.29475	6.14679	28.4252	0.224284	1.08639	9.26919
021020_3dpfA_Right_HC2	6.20078	0.85547	WT	3	28	17.603	4.94366	7.53086	74.9082	0.297789	1.00045	5.12488
021020_3dpfA_Right_HC3	5.01531	0.52711	WT	3	36	17.1111	5.2584	4.59708	35.4442	0.254896	0.634422	7.10401
021020_3dpfA_Right_HC4	3.73409	1.8932	WT	3	33	19.5994	4.5787	4.99898	38.02	0.274782	0.826974	2.68501
021020_3dpfA_Right_HC5	0.31879	0.79564	WT	3	19	13.3027	3.78476	5.09258	25.1738	0.309185	5.77374	6.68549
021020_3dpfA_Right_HC6	1.01549	0.14431	WT	3	18	12.6784	2.06928	2.18432	14.1969	0.453632	3.08975	9.72609
03052021_Right_S02_C_HC1	3.92642	2.80903	WT	5	25	14.6075	2.81987	2.32832	26.2716	0.251869	2.80581	0.742599
03052021_Right_S02_C_HC2	8.20635	2.58142	WT	5	34	14.6518	4.34144	2.45363	22.2394	0.308396	0.914286	4.01248
03052021_Right_S02_C_HC3	3.96964	3.03744	WT	5	32	25.3073	4.25302	5.02396	31.5189	0.464314	1.79158	4.34859
03052021_Right_S02_C_HC4	2.89083	3.50214	WT	5	48	28.9992	6.47521	10.0408	68.4729	0.226111	0.629056	8.697
03052021_Right_S02_C_HC7	11.4574	2.51508	WT	5	29	13.1417	3.52622	2.92351	20.4307	0.218536	1.18481	9.84064
03052021_Right_S02_C_HC9	12.935	3.50356	WT	5	44	23.4532	4.23265	3.45073	31.0219	0.242733	0.677336	5.22668
03052021_Right_S02_C_HC12	12.7727	4.07221	WT	5	33	24.6128	3.63057	4.84824	46.0772	0.286724	0.67225	4.00803
03052021_Right_S02_C_HC13	12.7493	4.23131	WT	5	32	23.4212	5.40527	12.1225	116.99	0.259994	0.601087	6.25497
03052021_Right_S02_C_HC14	12.3515	3.74575	WT	5	35	23.6339	5.29956	7.61674	69.1509	0.266125	0.605962	3.04858
03052021_Right_S02_C_HC15	3.38503	2.13587	WT	5	30	10.9502	3.75979	1.99261	18.8108	0.18536	4.76682	5.79405
03052021_Right_S02_C_HC16	7.58024	1.95181	WT	5	38	13.7086	4.02478	2.30656	5.82141	0.201317	0.537147	8.11503
03052021_Right_S02_C_HC17	11.3888	3.43561	WT	5	36	22.6978	4.98223	5.82482	46.267	0.282937	0.605905	7.43803
03052021_Right_S02_C_HC18	14.6772	3.03182	WT	5	44	37.8376	6.09732	11.8631	101.702	0.469561	0.544821	11.5906
03052021_Right_S02_C_HC19	12.968	2.2485	WT	5	45	25.4409	5.12854	5.04265	22.448	0.276626	0.575996	6.17557
03052021_Right_S02_C_HC20	10.9041	2.23016	WT	5	32	15.6803	5.28332	6.39746	36.024	0.220577	0.724639	6.69363
03052021_Right_S02_C_HC23	6.03831	1.95616	WT	5	50	13.2692	3.33591	0.975173	6.06564	0.19636	1.508	11.5036
03052021_Left_HC1	13.0025	2.14485	WT	5	28	12.914	4.78255	4.18669	16.0147	0.191386	0.9455	9.05605
03052021_Left_HC2	4.28219	1.58236	WT	5	19	8.74731	3.39537	2.57018	15.9403	0.220229	0.80582	6.01238
03052021_Left_HC3	14.8397	2.4529	WT	5	26	17.1821	4.60236	6.65759	57.1162	0.284076	0.51743	2.59618
03052021_Left_HC4	20.9713	2.81181	WT	5	29	19.7587	4.921	7.50417	74.662	0.288455	0.698605	5.50777
03052021_Left_HC5	3.21039	0.95061	WT	5	35	9.20318	3.80861	1.74885	18.2945	0.154425	5.81499	8.44002
03052021_Left_HC6	15.2738	1.67566	WT	5	28	16.2361	4.44761	4.49736	34.2908	0.356618	0.542439	7.7094
03052021_Left_HC7	10.3395	2.46674	WT	5	29	11.4771	3.60615	1.92213	15.6841	0.267473	2.17509	2.4833
03052021_Left_HC8	9.39515	1.39367	WT	5	37	12.7642	3.43558	1.46639	8.54987	0.251459	1.17763	6.2919
03052021_Left_HC9	22.0273	2.21957	WT	5	11	20.46	2.99378	14.9802	166.388	0.381633	0.534383	8.00872
03052021_Left_HC10	12.7591	1.69296	WT	5	35	12.7087	4.38049	2.06825	12.5116	0.282814	0.882029	9.01606
03052021_Left_HC11	3.49015	1.52854	WT	5	15	7.92121	1.90739	1.65324	15.2111	0.200132	3.66393	5.31459
03052021_Left_HC12	6.32599	1.26089	WT	5	39	10.9543	4.00284	1.32748	5.47189	0.205037	1.13193	5.72481
03052021_Right_HC1	no_kin	2.54692	WT	5	51	17.4877	5.52266	2.48612	5.5689	0.225984	0.979918	7.40074
03052021_Right_HC2	no_kin	1.52435	WT	5	21	11.1911	3.66695	2.63549	14.5545	0.343869	0.831776	5.54525
03052021_Right_HC3	no_kin	0.71465	WT	5	18	10.9826	3.55035	4.92017	34.0847	0.21704	0.551591	6.66475
03052021_Right_HC4	no_kin	2.06359	WT	5	38	15.4463	4.2288	2.23835	10.3772	0.254176	1.72598	8.36295
03052021_Right_HC5	no_kin	2.57969	WT	5	34	22.897	3.00377	3.83471	25.053	0.470431	1.28393	4.13106
03052021_Right_HC6	no_kin	2.22846	WT	5	25	17.8342	4.58592	8.03602	62.1767	0.178606	0.639826	5.44433
03052021_Right_HC7	no_kin	2.7043	WT	5	26	20.6178	4.85779	12.8195	129.064	0.18824	0.803756	6.22221
03052021_Right_HC8	no_kin	1.89448	WT	5	31	12.9293	4.44855	2.9645	15.2594	0.217283	1.31343	7.05503
03052021_Right_HC9	no_kin	1.61013	WT	5	29	10.2496	2.49443	1.24727	5.27837	0.183208	1.03649	7.07639
03052021_Right_HC10	no_kin	0.74008	WT	5	16	7.33768	2.38788	1.4768	12.2316	0.329798	3.99847	3.11774
6dpf_Right_HC1	no_kin	2.99767	WT	6	43	13.5097	5.51583	2.70118	14.6668	0.166155	0.166155	4.13783
6dpf_Right_HC2	10.0509	1.71466	WT	6	43	9.43882	3.97797	1.07504	4.05845	0.157707	0.157707	7.64318
6dpf_Right_HC3	5.67745	1.78086	WT	6	29	6.95027	2.55339	0.732384	7.24763	0.163495	0.163495	6.00525
6dpf_Right_HC4	14.3668	2.40936	WT	6	54	10.8792	3.97869	0.774508	8.0931	0.169111	0.169111	2.06559
6dpf_Right_HC5	no_kin	2.9678	WT	6	59	12.4227	6.23281	1.79686	30.0602	0.147878	0.147878	8.00658
6dpf_Right_HC6	12.3442	1.7758	WT	6	53	11.2808	4.23244	1.02077	7.01882	0.168543	0.168543	7.7324
6dpf_Right_HC7	no_kin	2.97096	WT	6	55	20.4823	3.71327	2.34757	13.5269	0.150489	0.150489	3.84466
6dpf_Right_HC8	5.06767	2.00794	WT	6	27	6.46953	2.78726	0.830998	12.5061	0.197154	0.197154	1.78029
6dpf_Right_HC9	no_kin	3.25203	WT	6	42	17.7742	5.34428	4.34064	42.5861	0.146863	0.146863	10.8835
6dpf_Right_HC10	no_kin	2.77711	WT	6	46	20.4287	6.31382	7.29039	60.2393	0.174409	0.174409	9.18762
6dpf_Right_HC11	5.16324	1.61627	WT	6	65	10.647	3.72594	0.724368	2.43717	0.116063	0.116063	5.09444
6dpf_Right_HC12	6.48514	1.93877	WT	6	35	10.0052	2.97174	0.967723	9.8004	0.233047	0.233047	1.50726
6dpf_Right_HC13	1.09583	1.17912	WT	6	19	7.71218	3.74055	2.67056	17.0989	0.256664	0.256664	5.44851
6dpf_Right_HC14	1.26969	1.36199	WT	6	22	8.32225	3.37259	2.03437	25.2968	0.232701	0.232701	6.6198
6dpf_Left_HC1	11.5699	3.40024	WT	6	49	24.098	4.44778	3.1637	19.5496	0.237123	0.825677	9.43208
6dpf_Left_HC2	10.8555	2.42933	WT	6	46	11.0754	2.47769	0.703191	0.33226	0.184261	1.63403	7.70905
6dpf_Left_HC3	13.4104	3.68808	WT	6	38	16.6472	4.72608	3.95216	43.2091	0.20323	1.07038	7.52744
6dpf_Left_HC4	14.0964	3.09532	WT	6	54	13.5391	4.02965	1.32307	7.88722	0.146169	0.938506	8.16145
6dpf_Left_HC5	3.3697	1.29121	WT	6	21	5.71924	2.51713	0.654561	6.82822	0.271928	4.75281	1.72753
6dpf_Left_HC7	20.6434	3.22889	WT	6	58	20.1315	3.68105	1.59191	14.5445	0.232432	0.81947	7.12818
6dpf_Left_HC8	14.7668	1.97294	WT	6	54	12.3309	4.64236	1.34972	5.6751	0.158859	1.67462	7.95976
6dpf_Left_HC10	13.7564	2.536	WT	6	46	12.0188	5.15932	1.78803	11.6381	0.156654	0.714632	6.68858
6dpf_Left_HC11	5.27145	1.63873	WT	6	29	8.18715	4.27532	1.57863	7.1199	0.158487	0.669371	5.84006
6dpf_Left_HC12	11.3425	1.81937	WT	6	75	11.1863	4.10414	0.756636	3.20598	0.0893474	2.7552	8.19169
6dpf_Left_HC13	3.55352	1.76052	WT	6	33	6.70934	3.1327	0.802483	10.354	0.147759	8.75042	1.3265
6dpf_Left_HC14	0.67544	0.54573	WT	6	19	5.95658	3.77855	2.0259	17.8629	0.1686	9.3388	8.71298
6dpf_Left_HC15	1.16621	1.41408	WT	6	26	5.91456	2.97814	1.01677	11.3628	0.121968	0.730385	10.0046
sputLeftHC1	no_kin	3.23892	Sputnik	5	24	15.2938	2.58667	2.35429	8.16724	0.3925	4.57491	5.28909
sputLeftHC2	no_kin	2.28636	Sputnik	5	12	12.2071	2.70048	4.01521	31.2931	0.694606	1.76728	1.94624
sputLeftHC3	no_kin	2.49051	Sputnik	5	17	16.8175	2.32508	3.37564	44.6828	0.73729	2.55524	5.95447
sputLeftHC4	no_kin	2.97565	Sputnik	5	12	15.8393	2.03997	5.21843	29.4423	0.224753	1.17146	10.1353
sputLeftHC5	no_kin	2.69068	Sputnik	5	12	17.2429	2.32554	5.96141	14.6603	0.477583	1.22585	7.44449
sputRightHC1	no_kin	1.42237	Sputnik	5	20	13.4488	3.08416	2.72033	13.632	0.476551	1.44966	4.79167
sputRightHC2	no_kin	2.80013	Sputnik	5	23	13.6751	3.89816	4.19202	34.9667	0.188381	0.507252	6.37763
sputRightHC3	no_kin	2.1653	Sputnik	5	14	11.5052	3.46239	8.23469	24.298	0.226259	0.834093	8.27462
sputRightHC4	no_kin	3.31028	Sputnik	5	23	15.0453	4.08403	3.54545	31.774	0.488219	1.8324	0.888967
sputRightHC5	no_kin	2.44857	Sputnik	5	30	13.1873	2.8131	1.37458	36.4164	0.378731	1.27176	5.22854
04222022_SputB_Left_HC1	4.32495	1.78638	Sputnik	5	18	11.6905	2.35084	2.43359	16.7226	0.332871	0.537142	6.46056
04222022_SputB_Left_HC2	3.99823	1.64977	Sputnik	5	22	9.90407	2.44851	1.59397	11.4113	0.304875	0.505661	3.80294
04222022_SputB_Left_HC3	19.3514	2.63754	Sputnik	5	23	21.8356	4.06911	5.24334	40.6956	0.673263	0.691376	6.25336
04222022_SputB_Left_HC4	7.29565	3.19796	Sputnik	5	18	20.8937	3.68153	7.98868	67.9752	0.541374	0.5309	6.8094
04222022_SputB_Left_HC5	11.7079	2.90665	Sputnik	5	29	17.4587	3.59724	3.43151	19.7614	0.296754	1.68557	7.14745
04222022_SputB_Left_HC6	12.4179	3.06562	Sputnik	5	29	16.3436	3.74027	2.80461	17.2026	0.37281	1.0947	7.7888
04042022_SputA_Right_HC1	0.84959	0.30923	Sputnik	5	13	10.9336	2.72399	3.16696	6.486	0.572123	6.2883	5.38225
04042022_SputA_Right_HC2	1.6206	0.82227	Sputnik	5	23	16.3199	2.39176	2.62152	11.3527	0.451073	3.34391	4.48245
04042022_SputA_Right_HC3	0.50249	0.16718	Sputnik	5	14	8.29818	1.89199	1.61148	9.52256	0.360475	4.47381	5.47621
CaVRight_HC1	13.629	1.80458	CaV	5	24	11.2957	2.82142	1.6589	10.4954	0.349697	2.21541	3.36371
CaVRight_HC2	14.0607	3.06327	CaV	5	59	25.8976	3.25472	1.73602	10.642	0.298032	1.08704	9.21059
CaVRight_HC3	no_kin	1.55056	CaV	5	22	10.4183	2.98875	1.91929	14.9279	0.347446	2.18313	12.1678
CaVRight_HC4	15.8623	2.36864	CaV	5	72	26.4006	3.77083	1.55816	8.60156	0.261072	1.31172	10.274
CaVRight_HC5	12.5234	2.49027	CaV	5	40	18.0855	5.38937	4.28089	29.505	0.218634	1.41904	11.7289
CaVRight_HC7	15.9385	2.56868	CaV	5	41	24.9139	3.22424	2.26701	4.96152	0.441112	0.846996	9.39994
CaVRight_HC8	12.4439	2.16317	CaV	5	42	20.6003	4.61247	2.89631	2.39142	0.352308	1.52515	11.12
CaVRight_HC9	4.12	1.55052	CaV	5	20	10.3469	2.737	2.0276	2.88613	0.322966	0.590974	7.41994
CaVRight_HC11	9.55762	2.51369	CaV	5	26	16.2894	2.51756	2.80049	20.3324	0.22748	2.7239	15.1195
CaVLeft_HC1	7.52461	2.5129	CaV	5	28	16.6842	3.54063	2.80503	19.8947	0.40434	1.72873	13.1237
CaVLeft_HC2	12.8285	2.24103	CaV	5	41	16.794	2.67546	1.39983	15.5506	0.275138	5.40335	15.114
CaVLeft_HC3	12.7123	2.77354	CaV	5	38	17.5757	5.26336	4.65213	43.2377	0.251806	1.69259	1.39239
CaVLeft_HC4	11.6417	2.78267	CaV	5	58	22.2535	3.77896	1.68968	10.0956	0.294797	0.948531	10.2053
CaVLeft_HC5	9.94349	1.86543	CaV	5	29	11.5554	3.65352	1.8139	12.3907	0.25064	5.60189	6.63605
CaVLeft_HC6	14.4883	2.72553	CaV	5	66	24.6888	4.59852	2.16627	8.97039	0.292881	2.12762	9.28556
CaVLeft_HC7	12.1592	2.55438	CaV	5	55	25.5549	5.02946	2.48957	8.1742	0.366105	2.67183	8.82311
CaVLeft_HC8	13.5234	2.50879	CaV	5	64	23.3833	3.9557	1.38318	9.29017	0.277784	1.86103	12.7613
CaVLeft_HC9	13.4527	2.40542	CaV	5	37	15.8185	3.44199	2.03496	14.3551	0.227545	1.93275	9.86055
CaVLeft_HC10	7.96712	1.82508	CaV	5	27	12.4586	2.76025	1.58506	9.07253	0.396819	4.18814	7.76966
CaVLeft_HC11	17.603	2.50741	CaV	5	40	23.238	4.60344	3.98169	16.4153	0.339506	1.12382	9.48015
CaVLeft_HC12	12.4298	2.4904	CaV	5	24	14.0756	3.09817	3.06866	12.874	0.163017	0.88761	11.8021
CaVLeft_HC13	10.4014	1.9102	CaV	5	21	11.8279	3.8516	3.26993	22.489	0.418628	0.944648	2.8384
CaVLeft_HC14	4.95431	2.04138	CaV	5	19	6.75389	2.45326	1.21063	7.71306	0.230029	6.35757	4.67682
CaVLeft_HC15	9.96952	1.84316	CaV	5	31	11.2295	2.86967	1.30469	7.03069	0.240316	1.06189	13.2847
CaV1.3B_Right_HC1	14.1667	2.13498	CaV	5	25	12.2184	2.84528	2.00368	10.4968	0.242999	2.52863	2.97431
CaV1.3B_Right_HC2	3.18064	1.48802	CaV	5	13	9.14425	2.69106	2.79587	18.9882	0.535548	8.38823	5.9255
CaV1.3B_Right_HC3	5.42528	1.96769	CaV	5	29	14.583	4.14479	3.39821	2.24342	0.202692	0.881938	6.92438
CaV1.3B_Right_HC4	no_kin	2.68466	CaV	5	14	15.9384	3.40615	10.2093	38.6311	0.26544	1.07047	8.11715
CaV1.3B_Right_HC5	no_kin	3.54319	CaV	5	71	27.098	3.21921	1.37374	14.2505	0.308212	6.06342	2.90522
CaV1.3B_Right_HC6	no_kin	1.33433	CaV	5	18	8.18142	2.86723	1.57843	3.32646	0.337136	1.02271	7.41455
CaV1.3B_Right_HC8	no_kin	3.56038	CaV	5	42	20.5072	4.25778	3.37877	14.6755	0.24874	3.46749	1.29533
CaV1.3B_Right_HC11	no_kin	2.38676	CaV	5	23	14.6798	2.51921	2.68762	14.0101	0.290567	1.26529	5.94448
CaV1.3B_Right_HC12	no_kin	1.49001	CaV	5	28	12.2674	2.71066	1.67408	4.85944	0.271924	1.90639	2.76845
CaV1.3B_Right_HC13	no_kin	1.48228	CaV	5	45	23.3519	2.02551	2.97134	4.69346	0.317433	1.35032	7.21362
CaV1.3B_Right_HC14	no_kin	2.21498	CaV	5	34	12.3026	3.09894	1.63257	12.6465	0.206378	1.18912	4.54589
CaV1.3B_Right_HC15	no_kin	1.89909	CaV	5	36	13.5338	3.6413	1.99358	7.15773	0.208317	1.12723	1.4322
CaV1.3B_Right_HC17	no_kin	2.72109	CaV	5	34	21.6959	4.58324	3.91738	16.5139	0.424819	1.17409	8.03958
CaV1.3B_Left_HC1	8.80035	1.9406	CaV	5	21	9.80454	3.10012	1.84717	4.15168	0.227229	0.883008	7.77337
CaV1.3B_Left_HC2	7.5299	2.59529	CaV	5	13	9.88649	2.20584	2.77033	15.3227	0.272799	1.72585	2.37462
CaV1.3B_Left_HC3	6.95525	2.53771	CaV	5	15	10.901	3.46069	5.14154	26.7695	0.370945	0.935962	6.45939
CaV1.3B_Left_HC4	7.39806	2.04446	CaV	5	16	9.66359	2.74227	2.34265	12.514	0.328104	0.817901	7.02834
CaV1.3B_Left_HC9	no_kin	3.3775	CaV	5	48	17.2644	6.12855	3.63236	1.84052	0.269682	1.60308	12.782
CaV1.3B_Left_HC10	no_kin	3.65051	CaV	5	96	32.713	5.09418	1.58851	7.31389	0.305712	2.38032	8.60785
CaV1.3B_Left_HC12	no_kin	3.8919	CaV	5	90	32.0866	4.47829	1.7966	5.21243	0.257276	2.41458	10.1487
CaV1.3B_Left_HC17	no_kin	1.30321	CaV	5	11	6.8931	2.87975	3.22447	20.8481	0.356885	1.43955	10.3336
