# Supplementary material for: Activity regulates a cell type-specific mitochondrial phenotype in zebrafish lateral line hair cells
Source: eLife journal article supplement (doi:10.7554/elife.80468), 2023-03-13
Supplement: supp [file elife_poa_e80468_Figure_7_figure_supplement_1_source_data_1.xlsx]

## Sheet: Sheet1
	Stereo length (um)	Total mito volume (um3)	Total Ribbon Volume (um3)	Average Ribbon Volume (um3)	Number of Ribbons	Max Mito distance to ribbons (um)	Median mito distance to ribbons (um)
CaVRight_HC1	1.80458	11.2957	0.357317	0.0893293	4	2.21541	3.36371
CaVRight_HC2	3.06327	25.8976	0.76673	0.109533	7	1.08704	9.21059
CaVRight_HC3	1.55056	10.4183	0.450869	0.0751448	6	2.18313	12.1678
CaVRight_HC4	2.36864	26.4006	0.657852	0.0822315	8	1.31172	10.274
CaVRight_HC5	2.49027	18.0855	0.681992	0.0974274	7	1.41904	11.7289
CaVRight_HC7	2.56868	24.9139	0.682631	0.0758479	9	0.846996	9.39994
CaVRight_HC8	2.16317	20.6003	0.705874	0.0882342	8	1.52515	11.12
CaVRight_HC9	1.55052	10.3469	0.258537	0.0517074	5	0.590974	7.41994
CaVRight_HC11	2.51369	16.2894	0.731711	0.10453	7	2.7239	15.1195
CaVRight_HC13	0.60706	5.29191	*	*	*
CaVLeft_HC1	2.5129	16.6842	0.596681	0.0994469	6	1.72873	13.1237
CaVLeft_HC2	2.24103	16.794	0.768014	0.0853349	9	5.40335	15.114
CaVLeft_HC3	2.77354	17.5757	0.634059	0.0905799	7	1.69259	1.39239
CaVLeft_HC4	2.78267	22.2535	0.654795	0.0935422	7	0.948531	10.2053
CaVLeft_HC5	1.86543	11.5554	0.481842	0.0688345	7	5.60189	6.63605
CaVLeft_HC6	2.72553	24.6888	0.775072	0.096884	8	2.12762	9.28556
CaVLeft_HC7	2.55438	25.5549	0.778518	0.111217	7	2.67183	8.82311
CaVLeft_HC8	2.50879	23.3833	0.869714	0.0790649	11	1.86103	12.7613
CaVLeft_HC9	2.40542	15.8185	0.567944	0.0811349	7	1.93275	9.86055
CaVLeft_HC10	1.82508	12.4586	0.536515	0.107303	5	4.18814	7.76966
CaVLeft_HC11	2.50741	23.238	0.99581	0.142259	7	1.12382	9.48015
CaVLeft_HC12	2.4904	14.0756	0.700251	0.0875313	8	0.88761	11.8021
CaVLeft_HC13	1.9102	11.8279	0.500438	0.0714912	7	0.944648	2.8384
CaVLeft_HC14	2.04138	6.75389	0.208725	0.0521812	4	6.35757	4.67682
CaVLeft_HC15	1.84316	11.2295	0.421626	0.0602323	7	1.06189	13.2847
CaVLeft_HC16	1.2523	8.8839	*	*	*	*	*
CaVLeft_HC17	1.10803	8.7461	*	*	*	*	*
CaV1.3B_Right_HC1	2.13498	12.2184	0.634081	0.0704534	9	2.52863	2.97431
CaV1.3B_Right_HC2	1.48802	9.14425	0.273873	0.0391246	7	8.38823	5.9255
CaV1.3B_Right_HC3	1.96769	14.583	0.637559	0.0910798	7	0.881938	6.92438
CaV1.3B_Right_HC4	2.68466	15.9384	0.679186	0.113198	6	1.07047	8.11715
CaV1.3B_Right_HC5	3.54319	27.098	0.907946	0.0907946	10	6.06342	2.90522
CaV1.3B_Right_HC6	1.33433	8.18142	0.200018	0.0400036	5	1.02271	7.41455
CaV1.3B_Right_HC8	3.56038	20.5072	0.806674	0.100834	8	3.46749	1.29533
CaV1.3B_Right_HC11	2.38676	14.6798	0.515141	0.0572379	9	1.26529	5.94448
CaV1.3B_Right_HC12	1.49001	12.2674	0.55913	0.0798757	7	1.90639	2.76845
CaV1.3B_Right_HC13	1.48228	23.3519	0.82053	0.09117	9	1.35032	7.21362
CaV1.3B_Right_HC14	2.21498	12.3026	0.512327	0.0512327	10	1.18912	4.54589
CaV1.3B_Right_HC15	1.89909	13.5338	0.626179	0.0695754	9	1.12723	1.4322
CaV1.3B_Right_HC17	2.72109	21.6959	0.737815	0.0670741	11	1.17409	8.03958
CaV1.3B_Left_HC1	1.9406	9.80454	0.427386	0.0610551	7	0.883008	7.77337
CaV1.3B_Left_HC2	2.59529	9.88649	0.519102	0.0519102	10	1.72585	2.37462
CaV1.3B_Left_HC3	2.53771	10.901	0.427236	0.071206	6	0.935962	6.45939
CaV1.3B_Left_HC4	2.04446	9.66359	0.32028	0.064056	5	0.817901	7.02834
CaV1.3B_Left_HC9	3.3775	17.2644	0.635124	0.090732	7	1.60308	12.782
CaV1.3B_Left_HC10	3.65051	32.713	0.923007	0.0710005	13	2.38032	8.60785
CaV1.3B_Left_HC12	3.8919	32.0866	0.862826	0.123261	7	2.41458	10.1487
CaV1.3B_Left_HC17	1.30321	6.8931	0.105098	0.0350328	3	1.43955	10.3336
03052021_Left_A_HC1			0.63187	0.126374	5
03052021_Left_A_HC2			0.363777	0.0727554	5
03052021_Left_A_HC3			0.751621	0.12527	6
03052021_Left_A_HC4			0.799301	0.133217	6
03052021_Left_A_HC5			0.42281	0.0528512	8
03052021_Left_A_HC6			0.74307	0.123845	6
03052021_Left_A_HC7			0.501068	0.100214	5
03052021_Left_A_HC8			0.617191	0.0881701	7
03052021_Left_A_HC9			0.636639	0.127328	5
03052021_Left_A_HC10			0.677384	0.0846729	8
03052021_Left_A_HC11			0.245466	0.0490932	5
03052021_Left_A_HC12			0.506727	0.056303	9
03052021_Right_A_HC1			0.824361	0.137393	6
03052021_Right_A_HC2			0.565761	0.0942935	6
03052021_Right_A_HC3			0.493979	0.0987957	5
03052021_Right_A_HC4			0.850892	0.121556	7
03052021_Right_A_HC5			0.855676	0.142613	6
03052021_Right_A_HC6			0.868691	0.144782	6
03052021_Right_A_HC7			0.969533	0.161589	6
03052021_Right_A_HC8			0.617326	0.0881895	7
03052021_Right_A_HC9			0.538052	0.0768646	7
03052021_Right_A_HC10			0.173097	0.0346193	5
03052021_Right_S02_C_HC1			0.446451	0.111613	4
03052021_Right_S02_C_HC2			0.494348	0.164783	3
03052021_Right_S02_C_HC3			0.804093	0.160819	5
03052021_Right_S02_C_HC4			1.01615	0.203229	5
03052021_Right_S02_C_HC7			0.522909	0.130727	4
03052021_Right_S02_C_HC9			0.794527	0.264842	3
03052021_Right_S02_C_HC12			0.814517	0.162903	5
03052021_Right_S02_C_HC13			0.854916	0.170983	5
03052021_Right_S02_C_HC14			0.76315	0.254383	3
03052021_Right_S02_C_HC15			0.413737	0.0689562	6
03052021_Right_S02_C_HC16			0.710093	0.142019	5
03052021_Right_S02_C_HC17			0.893534	0.178707	5
03052021_Right_S02_C_HC18			0.910884	0.182177	5
03052021_Right_S02_C_HC19			0.791391	0.197848	4
03052021_Right_S02_C_HC20			0.650036	0.130007	5
03052021_Right_S02_C_HC23			0.584726	0.0974543	6
6dpf_Right_HC1			0.666651	0.111108	6
6dpf_Right_HC2			0.605569	0.100928	6
6dpf_Right_HC3			0.294445	0.0736112	4
6dpf_Right_HC4			0.432401	0.0864803	5
6dpf_Right_HC5			0.604863	0.100811	6
6dpf_Right_HC6			0.716253	0.0895316	8
6dpf_Right_HC7			0.838612	0.119802	7
6dpf_Right_HC8			0.237413	0.0593533	4
6dpf_Right_HC9			0.823588	0.137265	6
6dpf_Right_HC10			0.829703	0.118529	7
6dpf_Right_HC11			0.478852	0.119713	4
6dpf_Right_HC12			0.362991	0.0907476	4
6dpf_Right_HC13			0.19392	0.0646399	3
6dpf_Right_HC14			0.167654	0.0279424	6
6dpf_Left_HC1			1.09568	0.182613	6
6dpf_Left_HC2			0.680109	0.136022	5
6dpf_Left_HC3			0.761458	0.152292	5
6dpf_Left_HC4			0.517685	0.103537	5
6dpf_Left_HC5			0.320523	0.0641046	5
6dpf_Left_HC7			0.612095	0.102016	6
6dpf_Left_HC8			0.688262	0.0983231	7
6dpf_Left_HC10			0.480003	0.0800005	6
6dpf_Left_HC11			0.347393	0.0434241	8
6dpf_Left_HC12			0.619873	0.0885533	7
6dpf_Left_HC13			0.260353	0.0520706	5
6dpf_Left_HC14			0.124894	0.0208157	6
6dpf_Left_HC15			0.121372	0.0404574	3
